# Supplementary material for: Total synthesis of pseudouridineviaHeck-typeC-glycosylation
Source: Royal Society of Chemistry journal article supplement (doi:10.1039/c9nj01012b), 2019-01-01
Supplement: c9nj01012b1.pdf [file c9nj01012b1.pdf]

**Table S1.** Optimization for the Heck reaction of 5-iodouracil (**3**) with glycal **4**

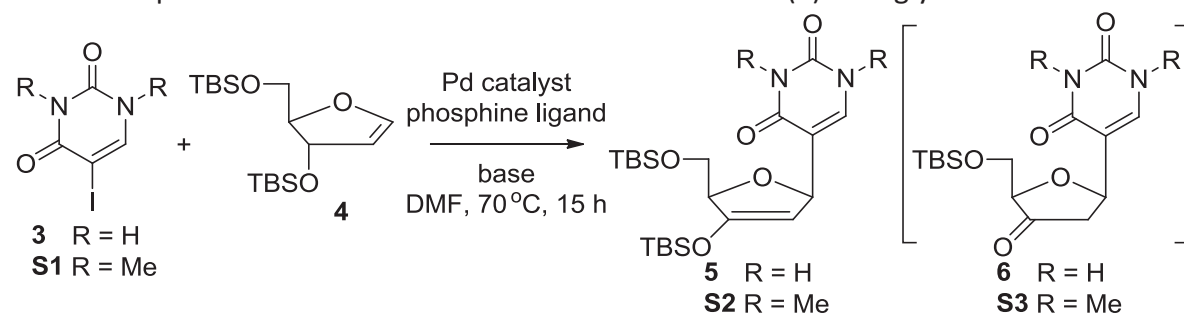

| entry <sup>a</sup> | aryl iodide | Pd catalyst (0.1 equiv)            | phosphine ligand (0.2 equiv) | base (1.5 equiv)            | yield (%) <sup>b,c</sup> |
|--------------------|-------------|------------------------------------|------------------------------|-----------------------------|--------------------------|
| 1                  | <b>S1</b>   | Pd(OAc) <sub>2</sub>               | PPh <sub>3</sub>             | Et <sub>3</sub> N           | 44 (22)                  |
| 2                  | <b>S1</b>   | Pd(OAc) <sub>2</sub>               | XantPhos                     | Et <sub>3</sub> N           | N.R.                     |
| 3                  | <b>S1</b>   | Pd(OAc) <sub>2</sub>               | DPPF                         | Et <sub>3</sub> N           | N.R.                     |
| 4                  | <b>S1</b>   | Pd(OAc) <sub>2</sub>               | DPPE                         | Et <sub>3</sub> N           | 38 (13)                  |
| 5                  | <b>S1</b>   | Pd <sub>2</sub> dba <sub>3</sub>   | PPh <sub>3</sub>             | Et <sub>3</sub> N           | 69                       |
| 6                  | <b>S1</b>   | Pd <sub>2</sub> dba <sub>3</sub>   | XantPhos                     | Et <sub>3</sub> N           | 83                       |
| 7                  | <b>S1</b>   | Pd <sub>2</sub> dba <sub>3</sub>   | DPPF                         | Et <sub>3</sub> N           | 62                       |
| 8                  | <b>S1</b>   | Pd <sub>2</sub> dba <sub>3</sub>   | DPPE                         | Et <sub>3</sub> N           | N.R.                     |
| 9                  | <b>S1</b>   | Pd(PPh <sub>3</sub> ) <sub>4</sub> | ----                         | Et <sub>3</sub> N           | 36                       |
| 10                 | <b>3</b>    | Pd(OAc) <sub>2</sub>               | PPh <sub>3</sub>             | Et <sub>3</sub> N           | 33 (6)                   |
| 11                 | <b>3</b>    | Pd <sub>2</sub> dba <sub>3</sub>   | PPh <sub>3</sub>             | Et <sub>3</sub> N           | 35                       |
| 12                 | <b>3</b>    | Pd <sub>2</sub> dba <sub>3</sub>   | XantPhos                     | Et <sub>3</sub> N           | 35 (2)                   |
| 13                 | <b>3</b>    | Pd <sub>2</sub> dba <sub>3</sub>   | XantPhos                     | DIPEA                       | 65                       |
| 14                 | <b>3</b>    | Pd <sub>2</sub> dba <sub>3</sub>   | XantPhos                     | DBU                         | N.R.                     |
| 15                 | <b>3</b>    | Pd <sub>2</sub> dba <sub>3</sub>   | XantPhos                     | DABCO                       | N.R.                     |
| 16                 | <b>3</b>    | Pd <sub>2</sub> dba <sub>3</sub>   | XantPhos                     | <i>n</i> -Bu <sub>3</sub> N | 83                       |

<sup>a</sup> reagents and conditions: glycal **4** (1.0 equiv), aryl iodide (**3** or **S1**: 2.0 equiv), catalyst (0.1 equiv), ligand (0.2 equiv), base (1.5 equiv), reaction concentration = 0.1 M. The reactions were conducted on 0.5 mmol scale; <sup>b</sup> Isolated yield (**5** or **S2**, respectively); <sup>c</sup> Numbers in parentheses represent the yield of the ketone product (**6** or **S3**, respectively)

**Table S2.** Optimization for the Heck reaction of 2,4-dimethoxy-5-iodopyrimidine (**8**) with glycal **4**

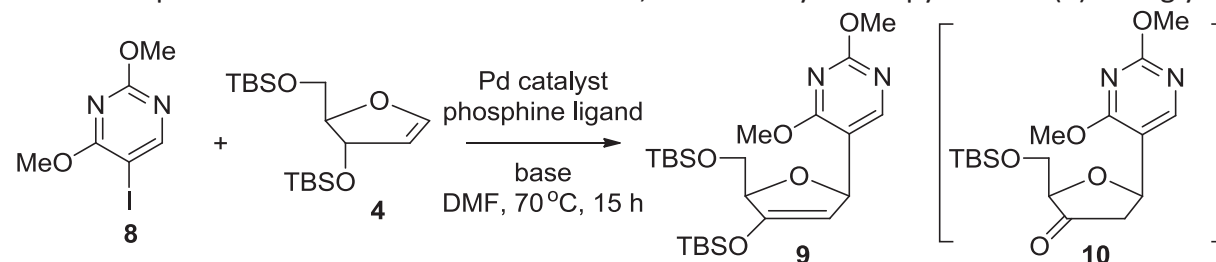

| entry <sup>a</sup> | aryl iodide | Pd catalyst (0.1 equiv)          | phosphine ligand (0.2 equiv) | base (1.5 equiv)                | yield (%) <sup>b,c</sup> |
|--------------------|-------------|----------------------------------|------------------------------|---------------------------------|--------------------------|
| 1                  | <b>8</b>    | Pd(OAc) <sub>2</sub>             | PPh <sub>3</sub>             | Et <sub>3</sub> N               | 7 (83)                   |
| 2                  | <b>8</b>    | Pd <sub>2</sub> dba <sub>3</sub> | PPh <sub>3</sub>             | Et <sub>3</sub> N               | 77 (trace)               |
| 3                  | <b>8</b>    | Pd <sub>2</sub> dba <sub>3</sub> | XantPhos                     | Et <sub>3</sub> N               | trace                    |
| 4                  | <b>8</b>    | Pd <sub>2</sub> dba <sub>3</sub> | PPh <sub>3</sub>             | <i>n</i> -Bu <sub>3</sub> N     | 76 (trace)               |
| 5                  | <b>8</b>    | Pd <sub>2</sub> dba <sub>3</sub> | XantPhos                     | <i>n</i> -Bu <sub>3</sub> N     | trace                    |
| 6                  | <b>8</b>    | Pd(OAc) <sub>2</sub>             | XantPhos                     | Et <sub>3</sub> N               | 6 (71)                   |
| 7                  | <b>8</b>    | Pd <sub>2</sub> dba <sub>3</sub> | PPh <sub>3</sub>             | Ag <sub>2</sub> CO <sub>3</sub> | N.R.                     |

<sup>a</sup> reagents and conditions: glycal **4** (1.0 equiv), aryl iodide **8** (2.0 equiv), catalyst (0.1 equiv), ligand (0.2 equiv), base (1.5 equiv), reaction concentration = 0.1 M. The reactions were conducted on 0.5 mmol scale; <sup>b</sup> Isolated yield (**9**); <sup>c</sup> Numbers in parentheses represent the yield of the ketone product **10**

1H

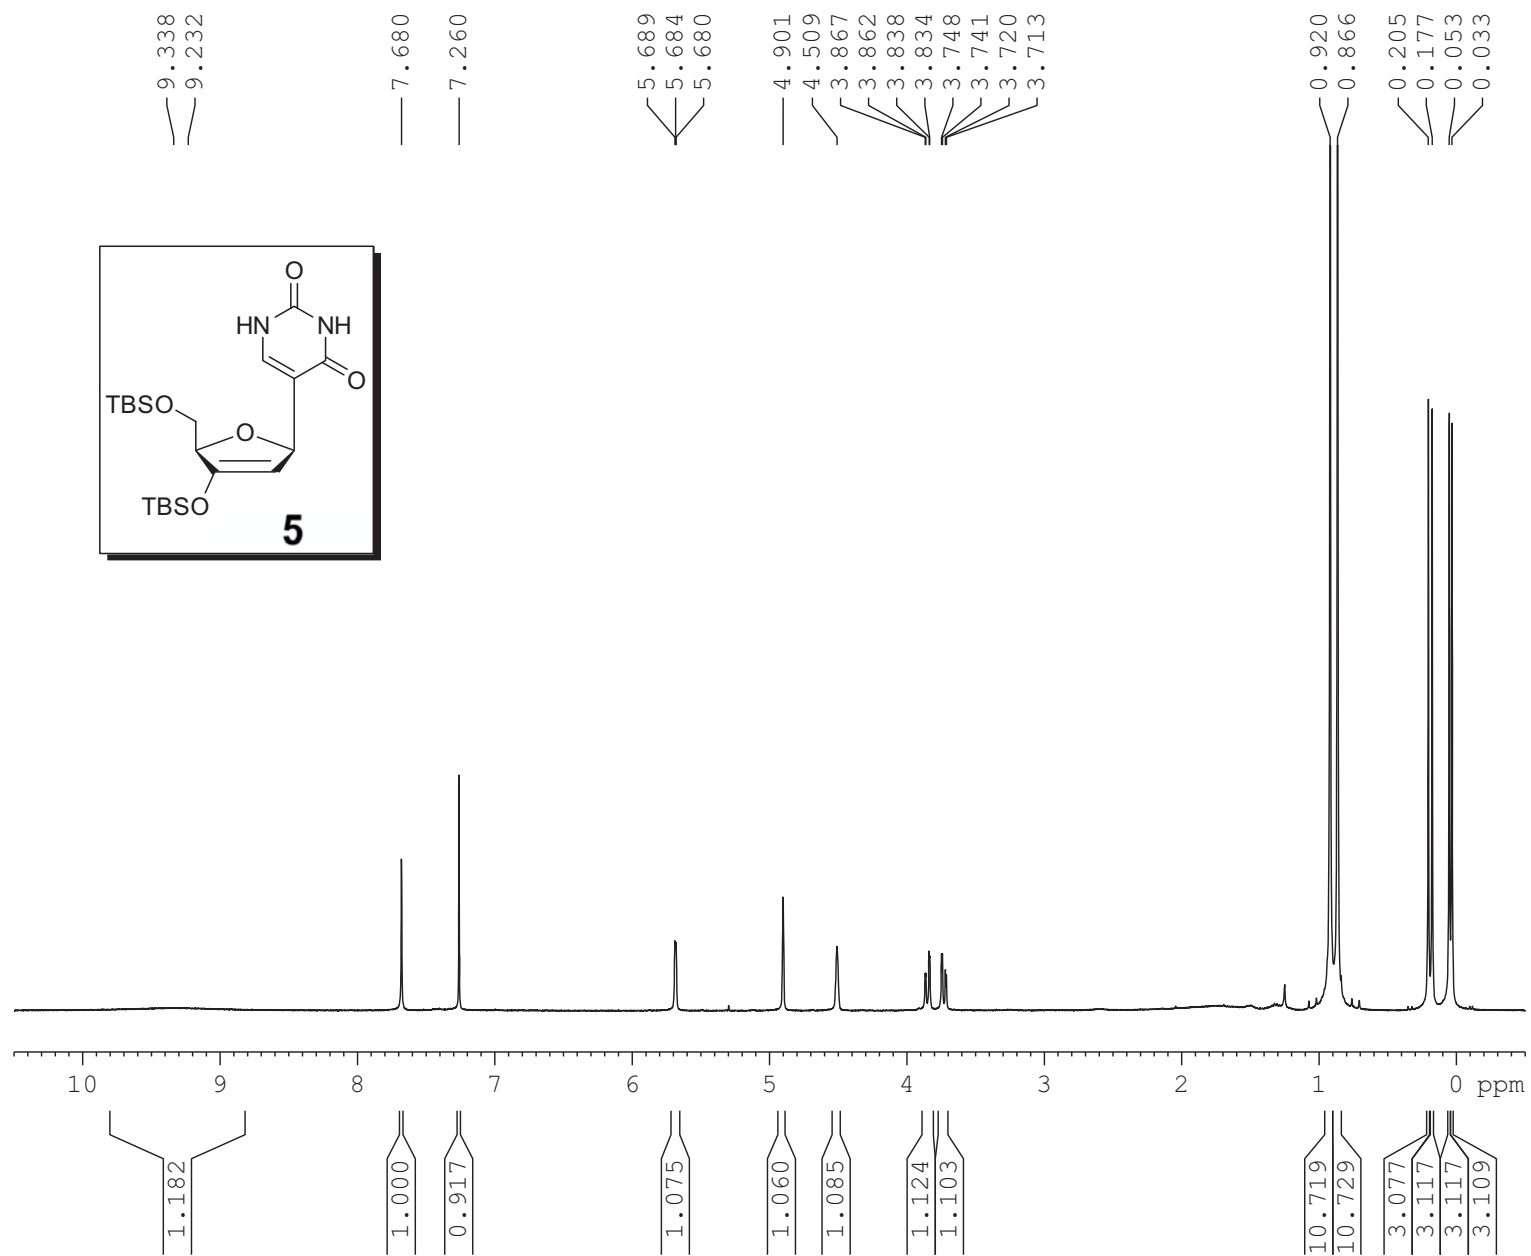

Current Data Parameters  
NAME TD003-1  
EXPNO 2  
PROCNO 1

F2 - Acquisition Parameters  
Date\_ 20151222  
Time 22.19  
INSTRUM spect  
PROBHD 5 mm PABBO BB/  
PULPROG zg30  
TD 32768  
SOLVENT CDCl3  
NS 12  
DS 0  
SWH 7211.539 Hz  
FIDRES 0.220079 Hz  
AQ 2.2719147 sec  
RG 99.72  
DW 69.333 usec  
DE 10.50 usec  
TE 297.6 K  
D1 2.00000000 sec  
TDO 1

==== CHANNEL f1 =====  
SFO1 400.1324008 MHz  
NUC1 1H  
P1 12.90 usec  
PLW1 15.00000000 W

F2 - Processing parameters  
SI 16384  
SF 400.1300098 MHz  
WDW EM  
SSB 0  
LB 0 Hz  
GB 0  
PC 1.00

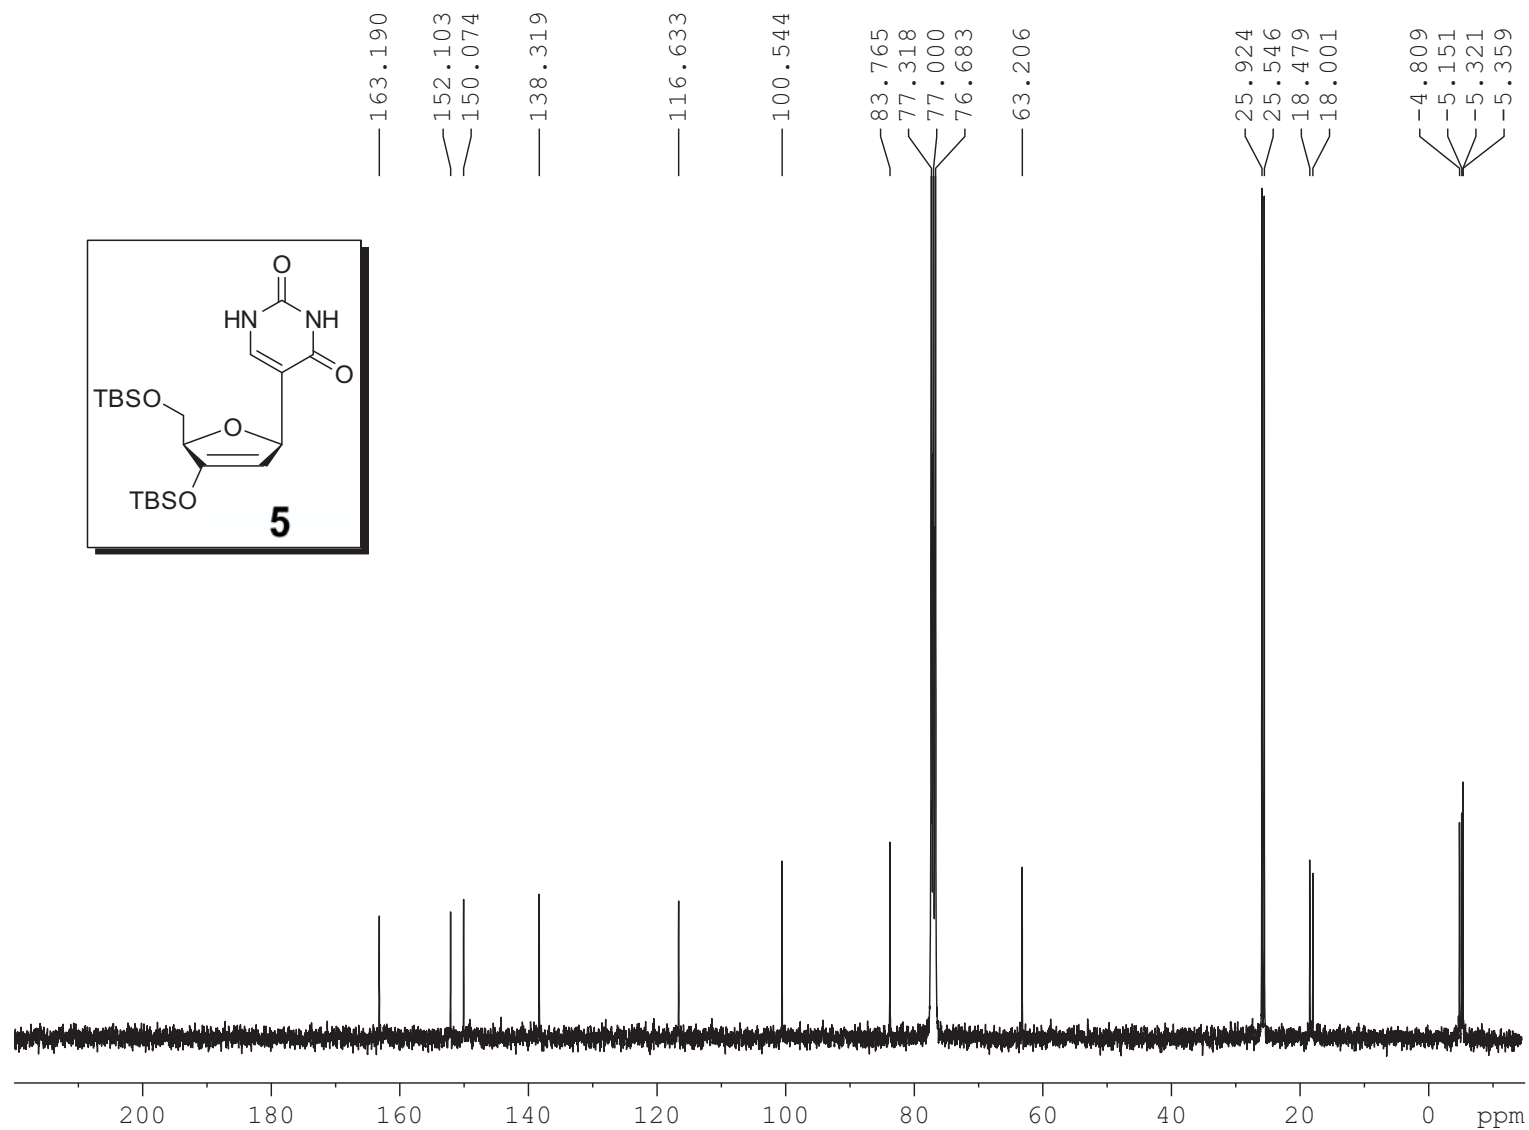

Current Data Parameters  
 NAME TD003-1  
 EXPNO 4  
 PROCNO 1

F2 - Acquisition Parameters  
 Date\_ 20151223  
 Time 0.02  
 INSTRUM spect  
 PROBHD 5 mm PABBO BB/  
 PULPROG zgpg30  
 TD 32768  
 SOLVENT CDCl3  
 NS 2000  
 DS 0  
 SWH 24038.461 Hz  
 FIDRES 0.733596 Hz  
 AQ 0.6815744 sec  
 RG 198.09  
 DW 20.800 usec  
 DE 6.50 usec  
 TE 298.8 K  
 D1 2.00000000 sec  
 D11 0.03000000 sec  
 TD0 1

===== CHANNEL f1 =====  
 SFO1 100.6233319 MHz  
 NUC1 13C  
 P1 10.00 usec  
 PLW1 47.50000000 W

===== CHANNEL f2 =====  
 SFO2 400.1316005 MHz  
 NUC2 1H  
 CPDPRG[2] waltz16  
 PCPD2 90.00 usec  
 PLW2 15.00000000 W  
 PLW12 0.33750001 W  
 PLW13 0.27338001 W

F2 - Processing parameters  
 SI 32768  
 SF 100.6127704 MHz  
 WDW EM  
 SSB 0  
 LB 2.00 Hz  
 GB 0  
 PC 1.00

1H

11.182  
11.146  
11.128

7.606

5.018  
5.002  
4.993  
4.977  
4.910  
3.934  
3.926  
3.919  
3.646  
3.329  
2.712  
2.696  
2.667  
2.651  
2.504  
2.500  
2.495  
2.491  
2.412  
2.387  
2.367  
2.342

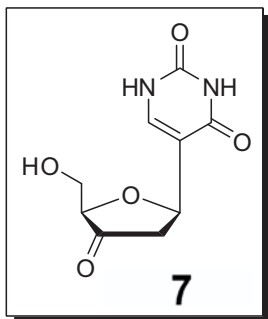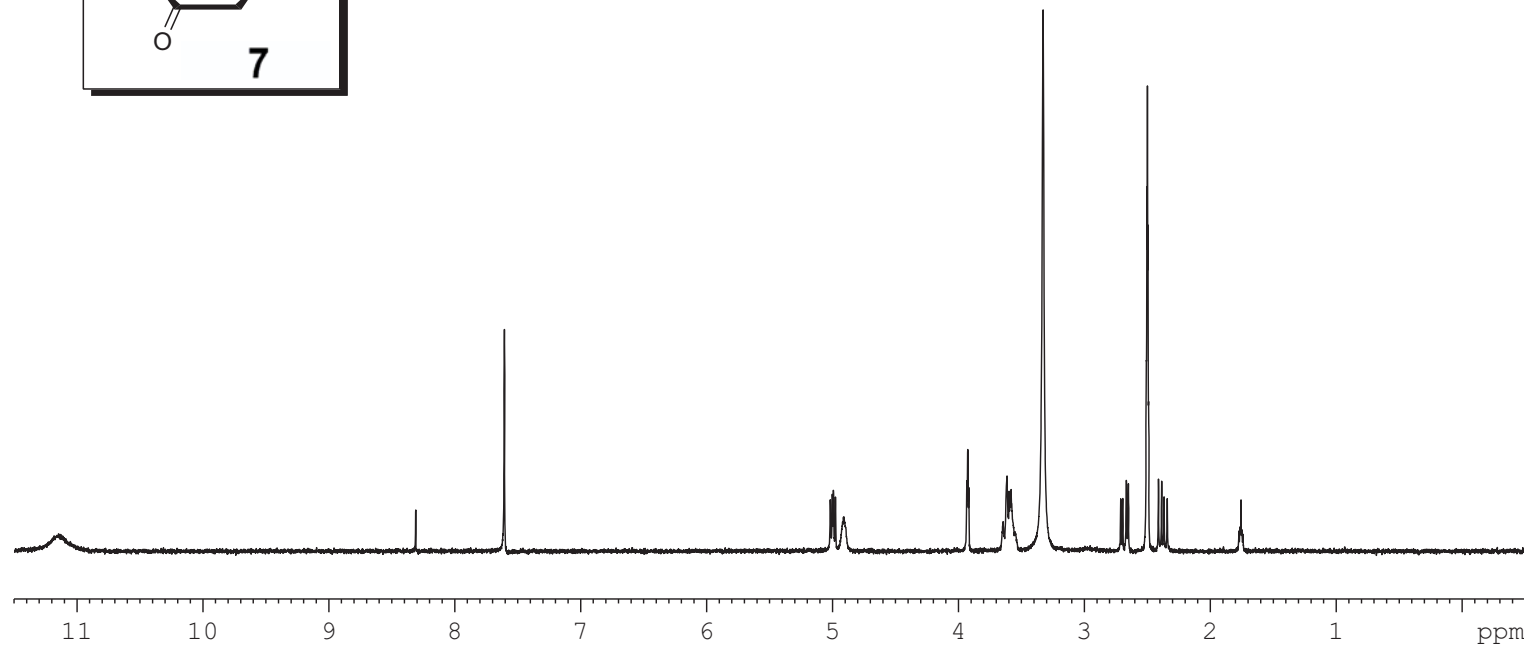

1.404

1.000

1.072  
0.872

1.002  
2.285  
7.998

0.999  
3.931  
1.004

Current Data Parameters  
NAME TD031  
EXPNO 1  
PROCNO 1

F2 - Acquisition Parameters  
Date\_ 20160713  
Time 23.16  
INSTRUM spect  
PROBHD 5 mm BBO BB-1H  
PULPROG zg30  
TD 32768  
SOLVENT DMSO  
NS 1  
DS 0  
SWH 7246.377 Hz  
FIDRES 0.221142 Hz  
AQ 2.2609921 sec  
RG 256  
DW 69.000 usec  
DE 6.50 usec  
TE 297.2 K  
D1 2.00000000 sec  
TD0 1

==== CHANNEL f1 =====  
NUC1 1H  
P1 14.40 usec  
PL1 1.80 dB  
SFO1 400.1324008 MHz

F2 - Processing parameters  
SI 16384  
SF 400.1300027 MHz  
WDW EM  
SSB 0  
LB 0 Hz  
GB 0  
PC 1.00

13C

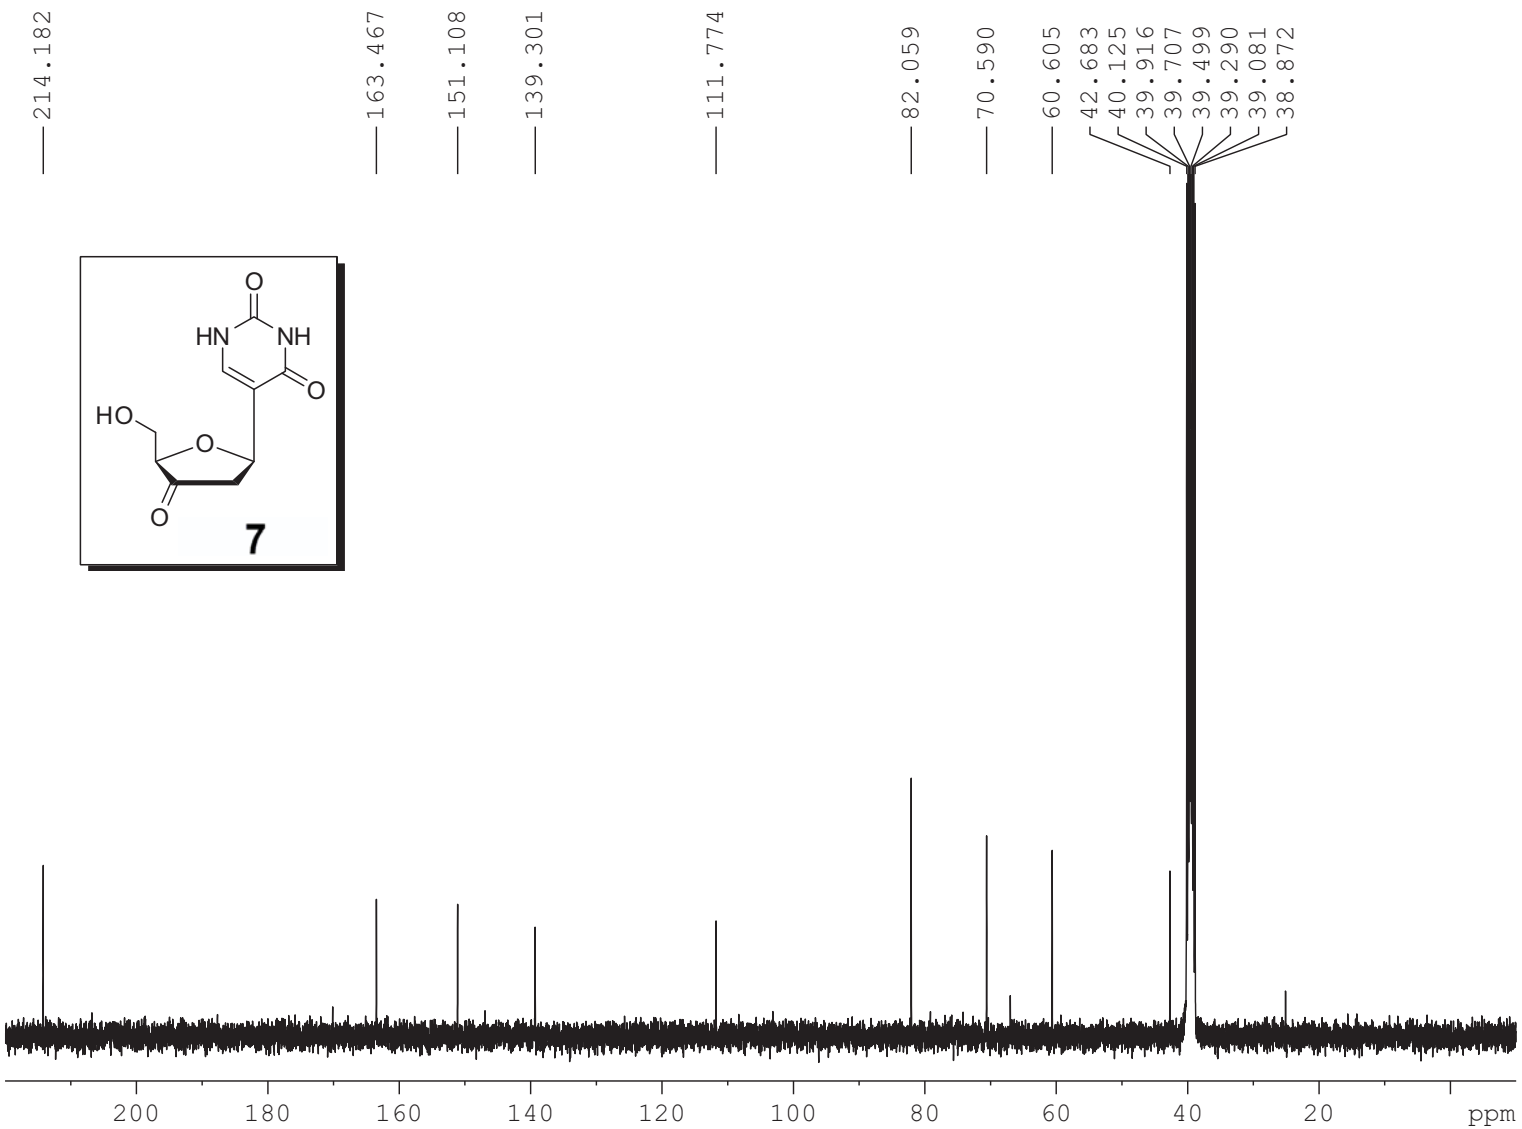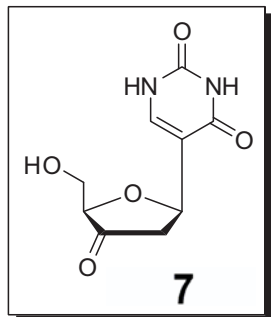

Current Data Parameters  
NAME TD031  
EXPNO 3  
PROCNO 1

F2 - Acquisition Parameters  
Date\_ 20160713  
Time 23.58  
INSTRUM spect  
PROBHD 5 mm BBO BB-1H  
PULPROG zgpg30  
TD 32768  
SOLVENT DMSO  
NS 2000  
DS 0  
SWH 24038.461 Hz  
FIDRES 0.733596 Hz  
AQ 0.6815744 sec  
RG 8192  
DW 20.800 usec  
DE 6.50 usec  
TE 297.5 K  
D1 2.00000000 sec  
D11 0.03000000 sec  
TD0 1

===== CHANNEL f1 =====  
NUC1 13C  
P1 9.00 usec  
PL1 7.00 dB  
SFO1 100.6233325 MHz

===== CHANNEL f2 =====  
CPDPRG[2] waltz16  
NUC2 1H  
PCPD2 90.00 usec  
PL2 1.80 dB  
PL12 17.00 dB  
PL13 20.00 dB  
SFO2 400.1316005 MHz

F2 - Processing parameters  
SI 32768  
SF 100.6128194 MHz  
WDW EM  
SSB 0  
LB 1.00 Hz  
GB 0  
PC 1.00

1H

10.964  
10.957

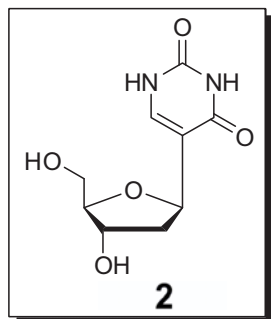

7.366

4.999  
4.990  
4.800  
4.786  
4.776  
4.761  
4.747  
4.710  
4.105  
3.687  
3.675  
3.669  
3.664  
3.658  
3.369  
2.503  
2.500  
2.496  
2.025  
2.021  
2.011  
2.006  
1.994  
1.989  
1.979  
1.975  
1.770  
1.755  
1.745  
1.738  
1.731  
1.724

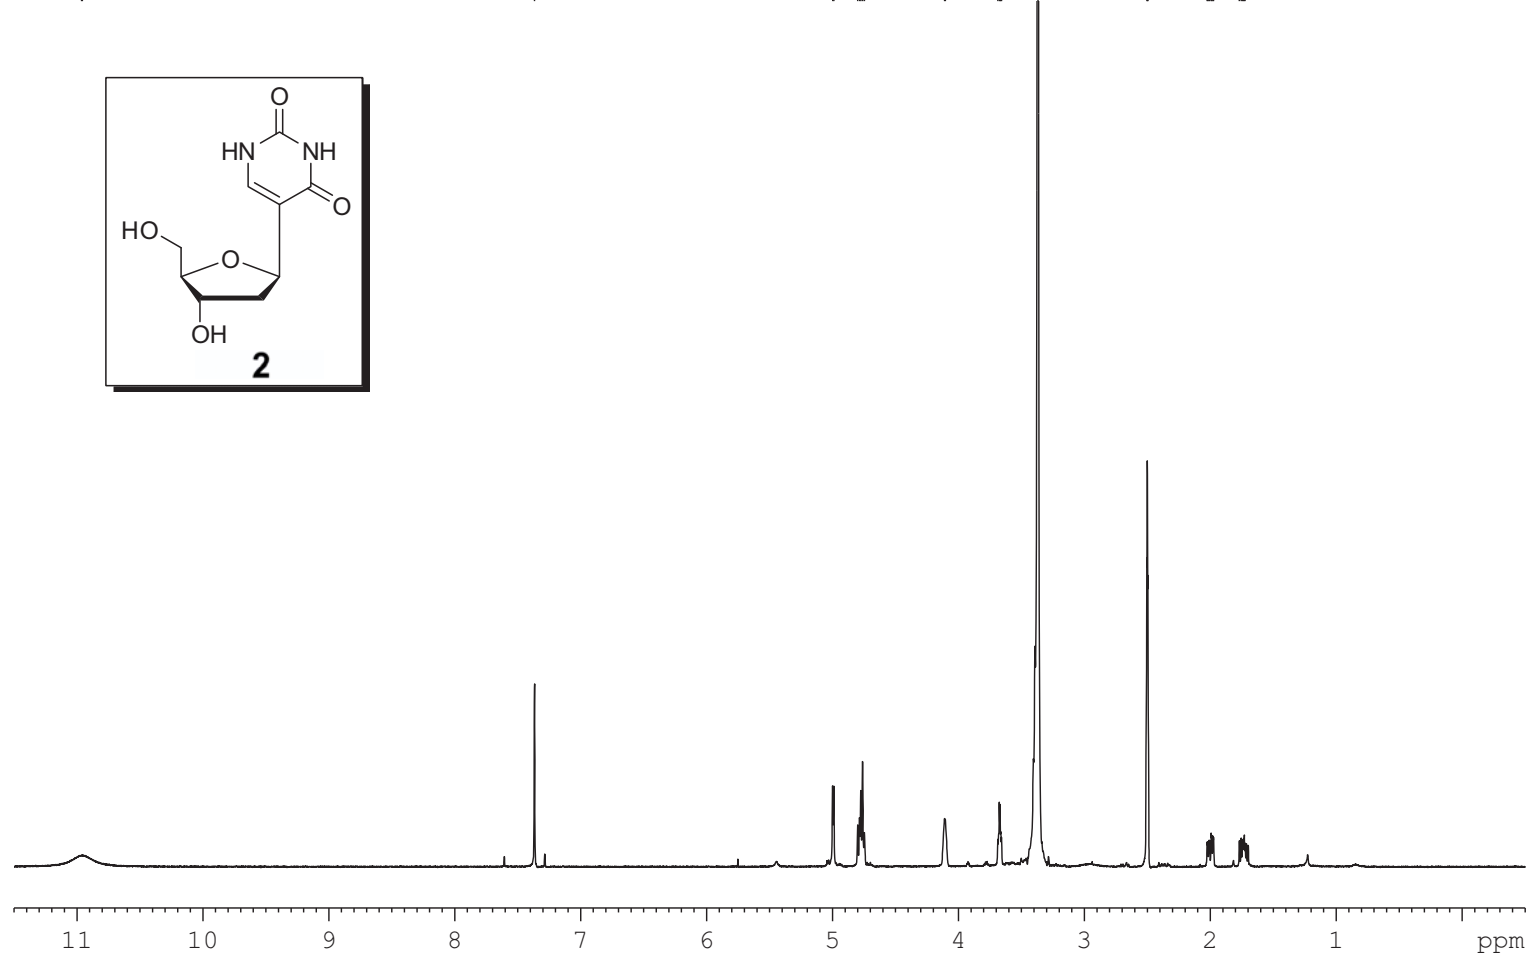

1.763

0.999

1.004  
2.042

1.079  
1.053  
2.525

4.458  
1.000  
1.047

Current Data Parameters  
NAME TD010  
EXPNO 1  
PROCNO 1

F2 - Acquisition Parameters  
Date\_ 20160115  
Time 20.54  
INSTRUM spect  
PROBHD 5 mm BBO BB-1H  
PULPROG zg30  
TD 32768  
SOLVENT DMSO  
NS 12  
DS 0  
SWH 7246.377 Hz  
FIDRES 0.221142 Hz  
AQ 2.2609921 sec  
RG 228.1  
DW 69.000 usec  
DE 6.50 usec  
TE 297.5 K  
D1 2.00000000 sec  
TD0 1

===== CHANNEL f1 =====  
NUC1 1H  
P1 14.40 usec  
PL1 1.80 dB  
SFO1 400.1324008 MHz

F2 - Processing parameters  
SI 16384  
SF 400.1300030 MHz  
WDW EM  
SSB 0  
LB 0 Hz  
GB 0  
PC 1.00

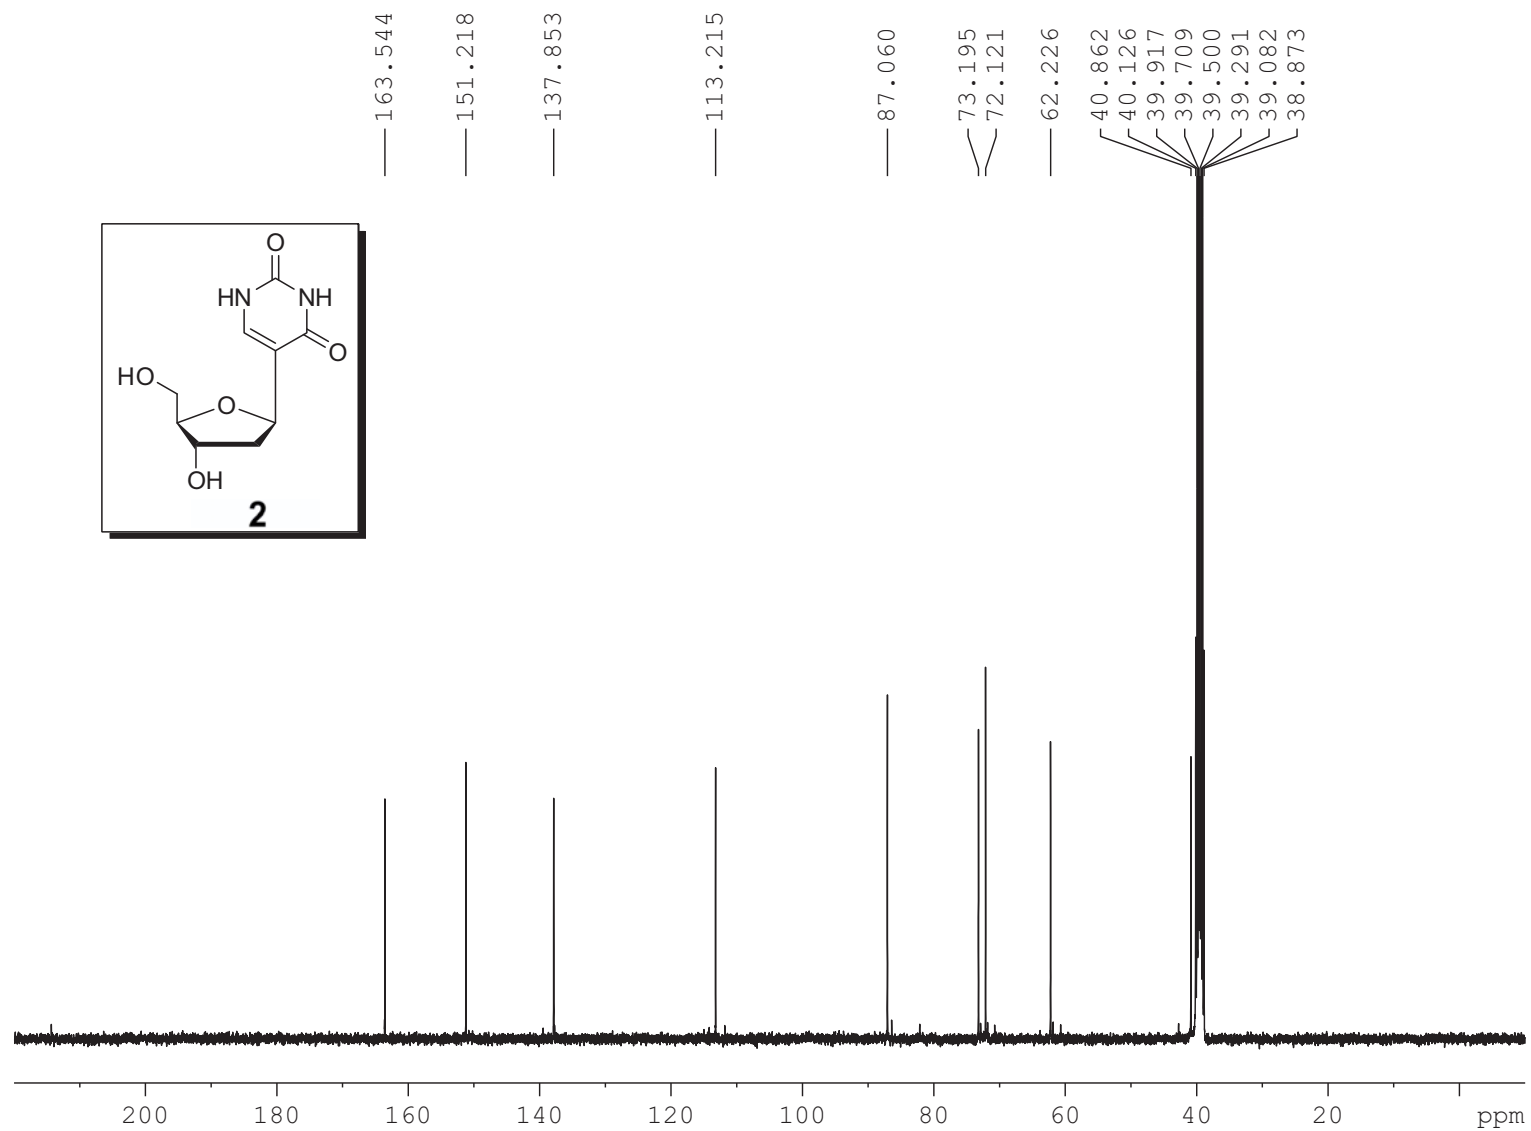

Current Data Parameters  
 NAME TD010  
 EXPNO 6  
 PROCNO 1

F2 - Acquisition Parameters  
 Date\_ 20160121  
 Time 1.20  
 INSTRUM spect  
 PROBHD 5 mm BBO BB-1H  
 PULPROG zgpg30  
 TD 32768  
 SOLVENT DMSO  
 NS 3000  
 DS 0  
 SWH 24038.461 Hz  
 FIDRES 0.733596 Hz  
 AQ 0.6815744 sec  
 RG 8192  
 DW 20.800 usec  
 DE 6.50 usec  
 TE 298.3 K  
 D1 2.00000000 sec  
 D11 0.03000000 sec  
 TD0 1

===== CHANNEL f1 =====  
 NUC1 13C  
 P1 9.00 usec  
 PL1 7.00 dB  
 SFO1 100.6233325 MHz

===== CHANNEL f2 =====  
 CPDPRG[2] waltz16  
 NUC2 1H  
 PCPD2 90.00 usec  
 PL2 1.80 dB  
 PL12 17.00 dB  
 PL13 20.00 dB  
 SFO2 400.1316005 MHz

F2 - Processing parameters  
 SI 32768  
 SF 100.6128092 MHz  
 WDW EM  
 SSB 0  
 LB 1.00 Hz  
 GB 0  
 PC 1.00

1H of P data

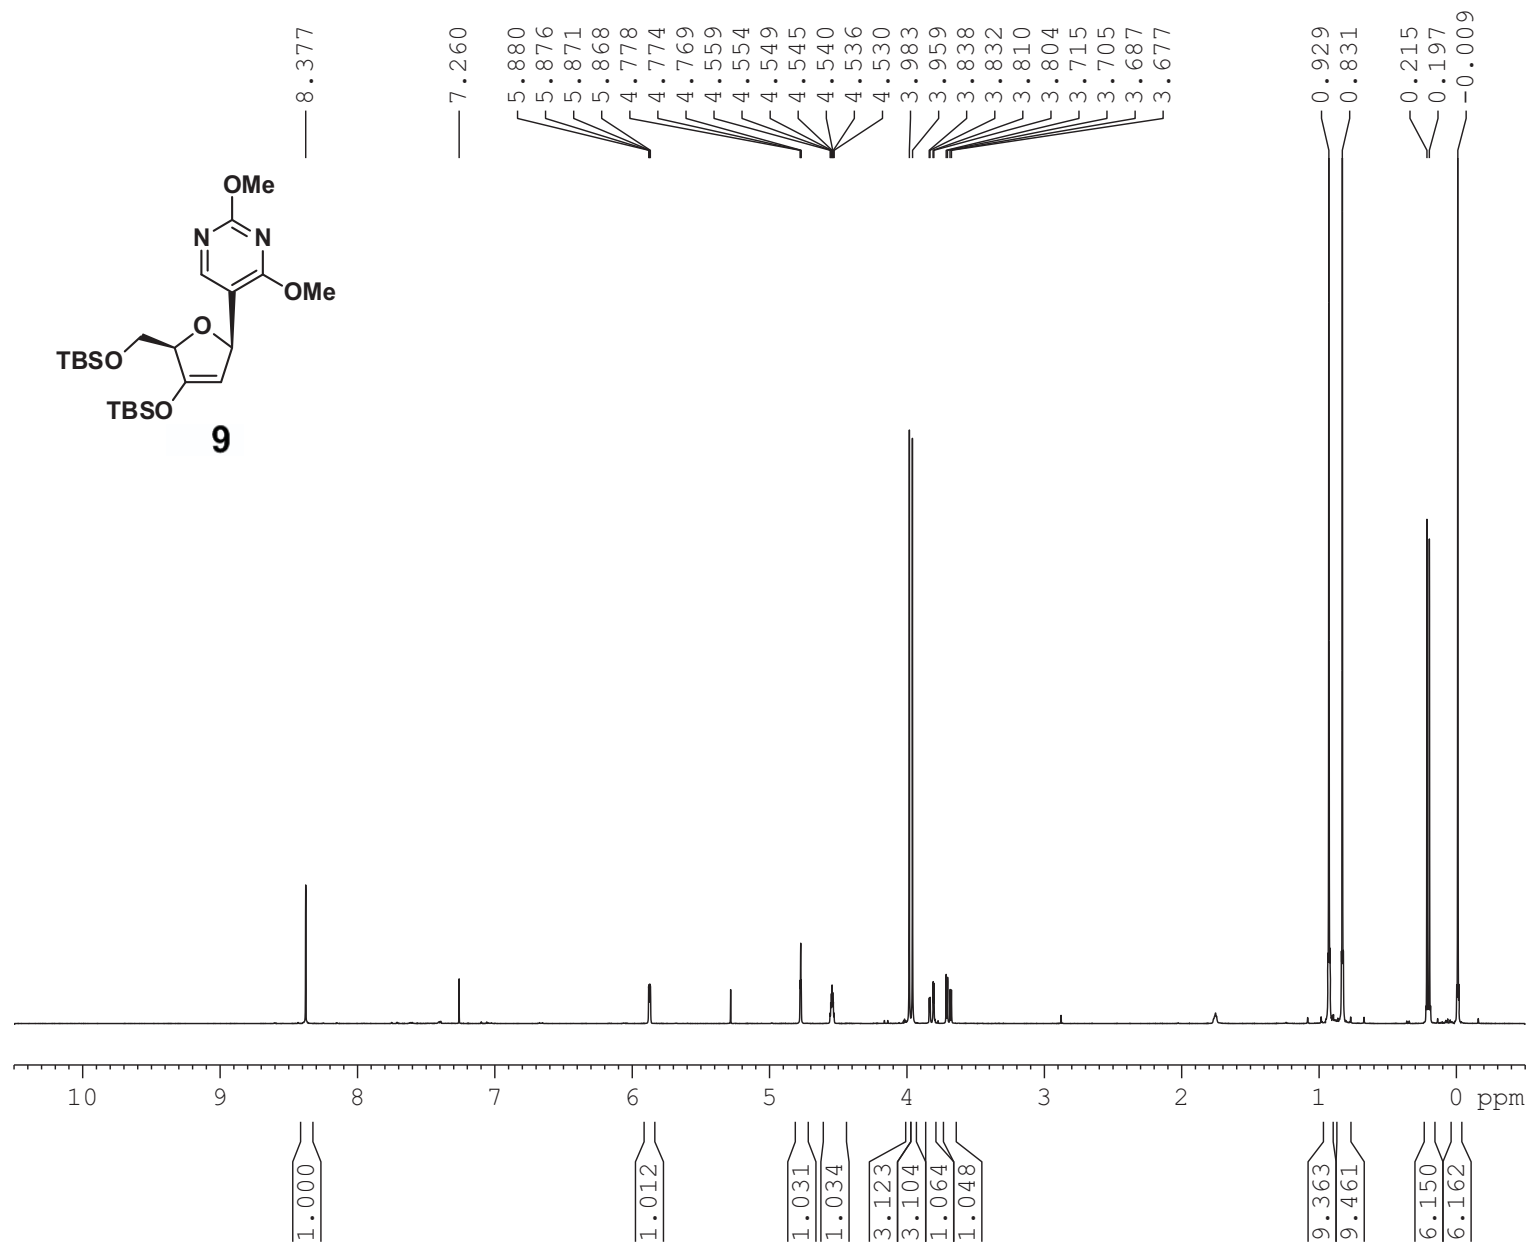

Current Data Parameters  
 NAME TQ111  
 EXPNO 101  
 PROCNO 1

F2 - Acquisition Parameters  
 Date\_ 20161231  
 Time 17.19  
 INSTRUM spect  
 PROBHD 5 mm PABBO BB/  
 PULPROG zg30  
 TD 32768  
 SOLVENT CDCl3  
 NS 16  
 DS 0  
 SWH 7211.539 Hz  
 FIDRES 0.220079 Hz  
 AQ 2.2719147 sec  
 RG 45.15  
 DW 69.333 usec  
 DE 10.50 usec  
 TE 297.8 K  
 D1 2.00000000 sec  
 TD0 1

===== CHANNEL f1 =====  
 SFO1 400.1324008 MHz  
 NUC1 1H  
 P1 12.90 usec  
 PLW1 15.00000000 W

F2 - Processing parameters  
 SI 16384  
 SF 400.1300099 MHz  
 WDW EM  
 SSB 0  
 LB 0 Hz  
 GB 0  
 PC 1.00



13C of P data

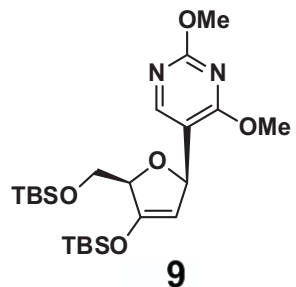

168.22  
164.53  
157.29  
151.04

116.28

99.33

83.92

76.76

63.80

54.40

53.62

25.81

25.34

18.34

17.82

-5.13

-5.54

-5.60

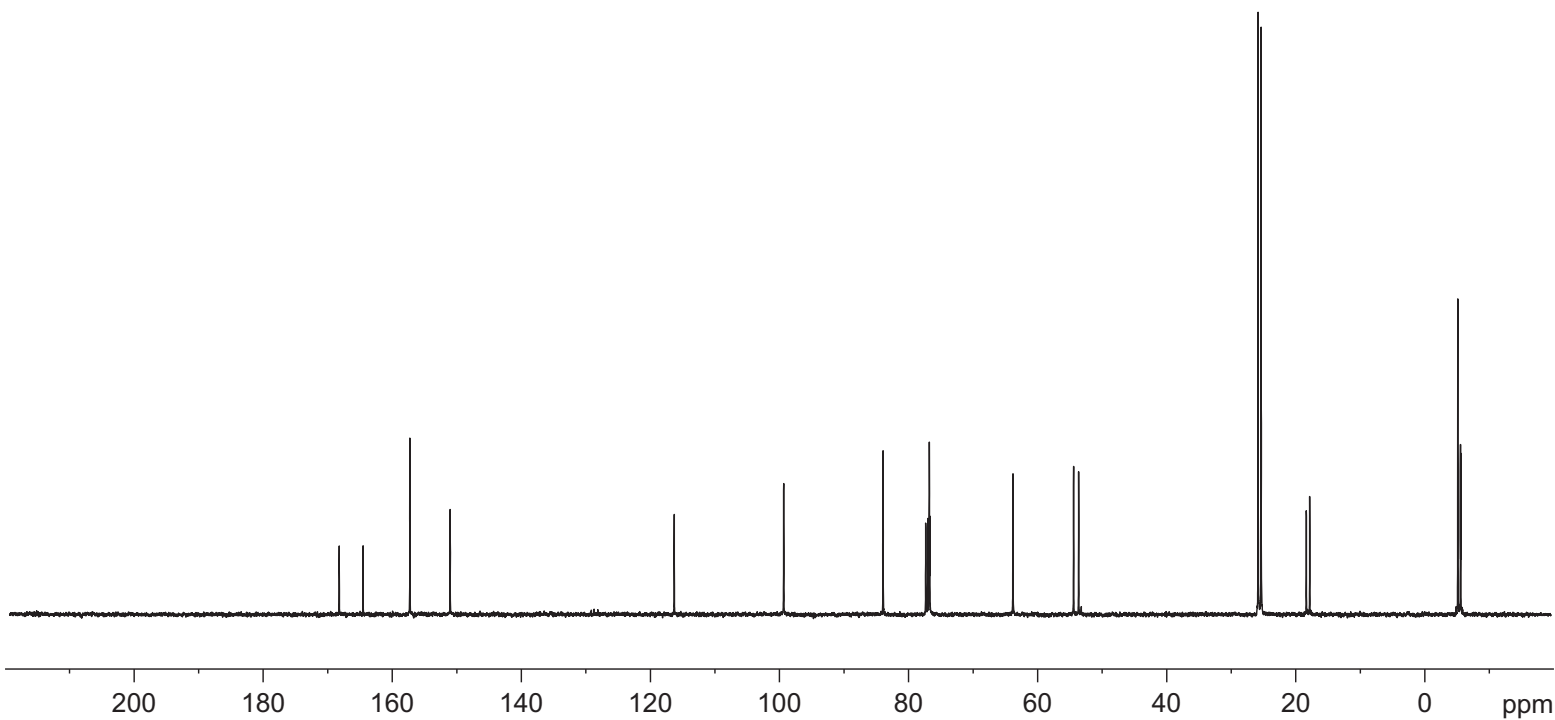

Current Data Parameters

NAME TQ111  
EXPNO 105  
PROCNO 1

F2 - Acquisition Parameters

Date\_ 20161231  
Time 17.31  
INSTRUM spect  
PROBHD 5 mm PABBO BB/  
PULPROG zgpg30  
TD 32768  
SOLVENT CDCl3  
NS 59  
DS 0  
SWH 24038.461 Hz  
FIDRES 0.733596 Hz  
AQ 0.6815744 sec  
RG 198.09  
DW 20.800 usec  
DE 6.50 usec  
TE 298.2 K  
D1 2.00000000 sec  
D11 0.03000000 sec  
TD0 1

===== CHANNEL f1 =====

SFO1 100.6228298 MHz  
NUC1 13C  
P1 10.00 usec  
PLW1 47.50000000 W

===== CHANNEL f2 =====

SFO2 400.1316005 MHz  
NUC2 1H  
CPDPRG[2] waltz16  
PCPD2 90.00 usec  
PLW2 15.00000000 W  
PLW12 0.33750001 W  
PLW13 0.27338001 W

F2 - Processing parameters

SI 32768  
SF 100.6127817 MHz  
WDW EM  
SSB 0  
LB 2.00 Hz  
GB 0  
PC 1.00

1H of P data

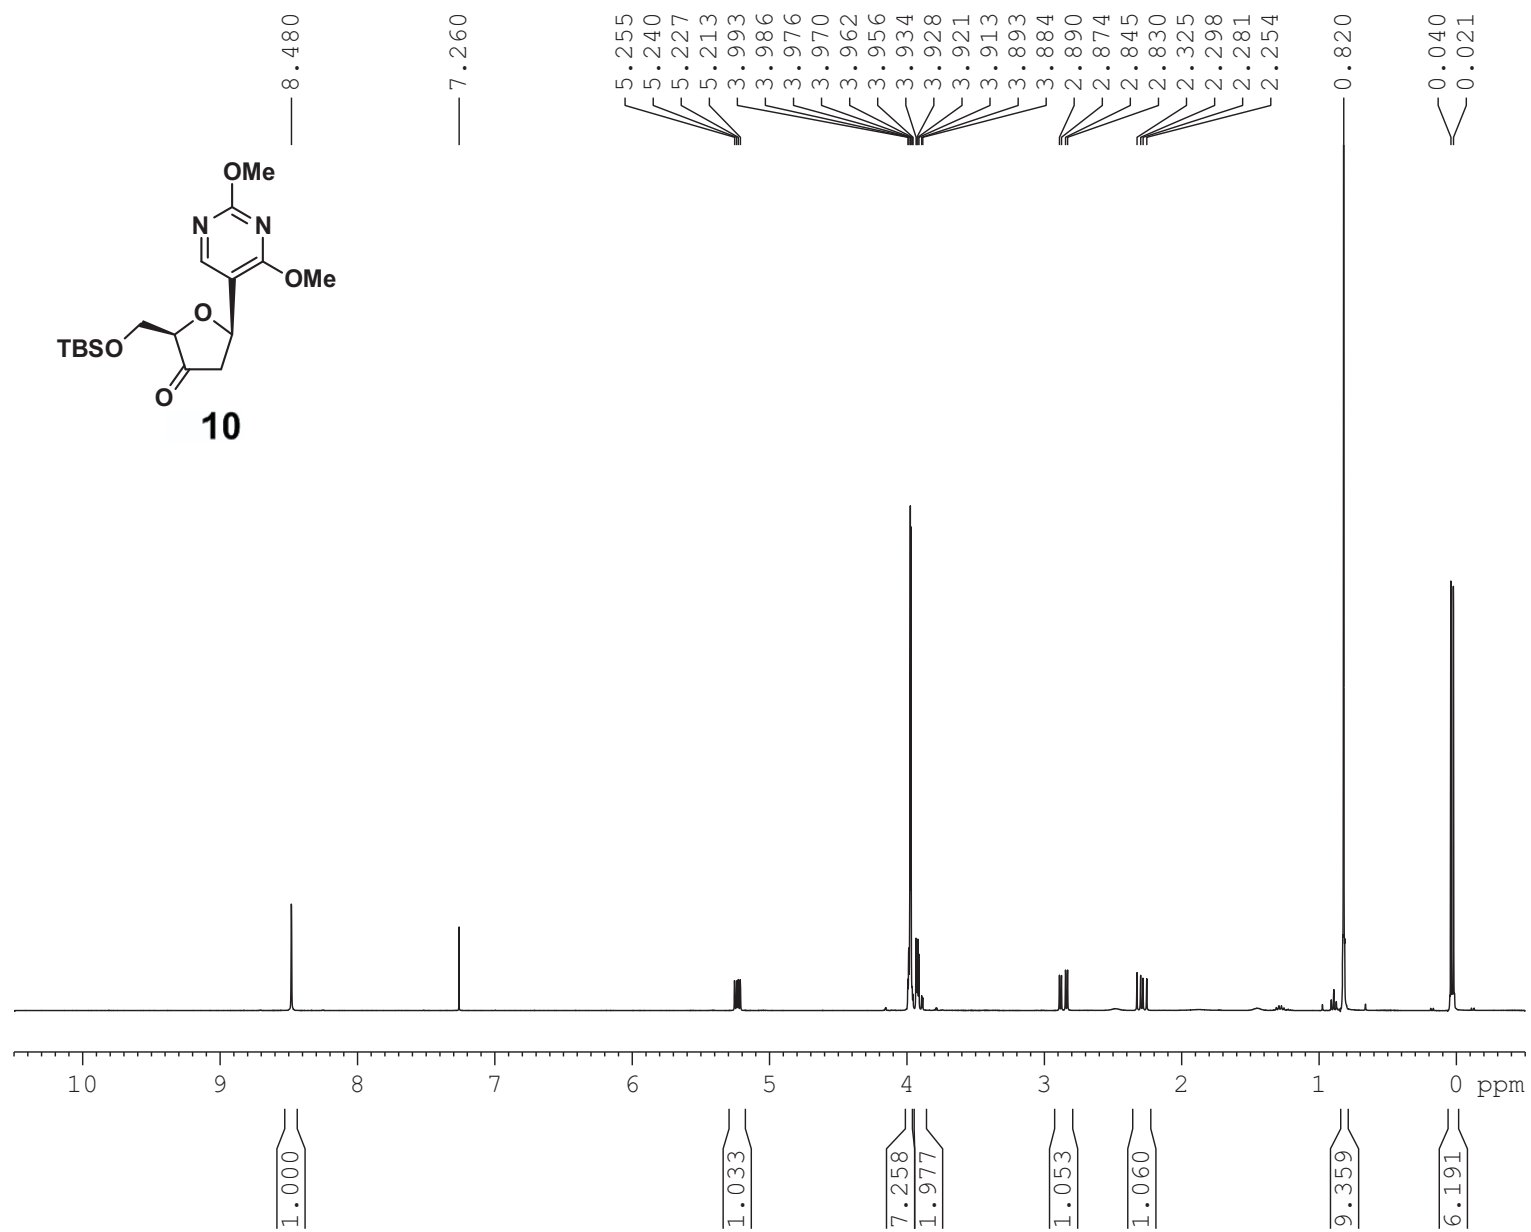

Current Data Parameters  
NAME TQ115  
EXPNO 101  
PROCNO 1

F2 - Acquisition Parameters  
Date\_ 20170101  
Time 21.51  
INSTRUM spect  
PROBHD 5 mm PABBO BB/  
PULPROG zg30  
TD 32768  
SOLVENT CDCl3  
NS 16  
DS 0  
SWH 7211.539 Hz  
FIDRES 0.220079 Hz  
AQ 2.2719147 sec  
RG 45.15  
DW 69.333 usec  
DE 10.50 usec  
TE 297.6 K  
D1 2.00000000 sec  
TD0 1

==== CHANNEL f1 =====  
SFO1 400.1324008 MHz  
NUC1 1H  
P1 12.90 usec  
PLW1 15.00000000 W

F2 - Processing parameters  
SI 16384  
SF 400.1300097 MHz  
WDW EM  
SSB 0  
LB 0 Hz  
GB 0  
PC 1.00

13C of P data

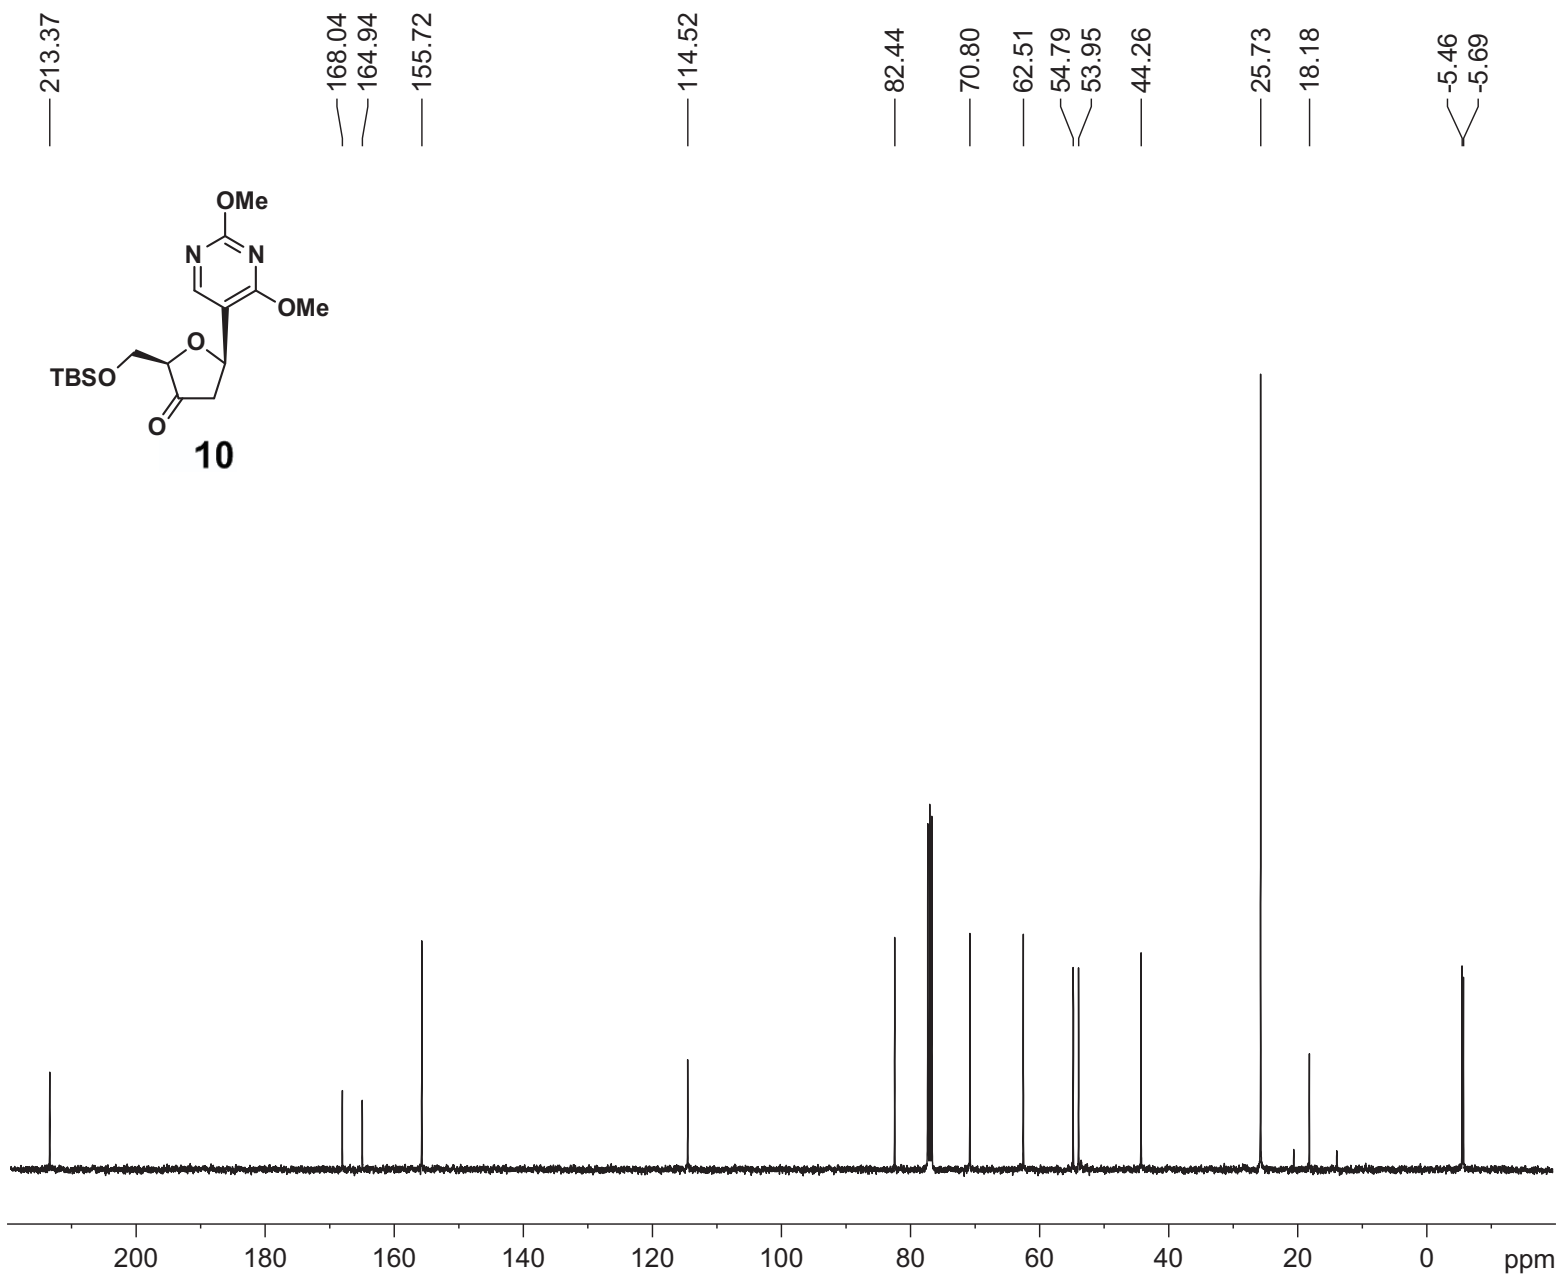

Current Data Parameters

NAME TQ115  
EXPNO 103  
PROCNO 1

F2 - Acquisition Parameters

Date\_ 20170101  
Time 21.56  
INSTRUM spect  
PROBHD 5 mm PABBO BB/  
PULPROG zgpg30  
TD 32768  
SOLVENT CDCl3  
NS 201  
DS 0  
SWH 24038.461 Hz  
FIDRES 0.733596 Hz  
AQ 0.6815744 sec  
RG 198.09  
DW 20.800 usec  
DE 6.50 usec  
TE 298.1 K  
D1 2.0000000 sec  
D11 0.0300000 sec  
TD0 1

==== CHANNEL f1 =====

SFO1 100.6228298 MHz  
NUC1 13C  
P1 10.00 usec  
PLW1 47.50000000 W

==== CHANNEL f2 =====

SFO2 400.1316005 MHz  
NUC2 1H  
CPDPRG2 waltz16  
PCPD2 90.00 usec  
PLW2 15.00000000 W  
PLW12 0.33750001 W  
PLW13 0.27338001 W

F2 - Processing parameters

SI 32768  
SF 100.6127736 MHz  
WDW EM  
SSB 0  
LB 2.00 Hz  
GB 0  
PC 1.00

1H of P 25-30

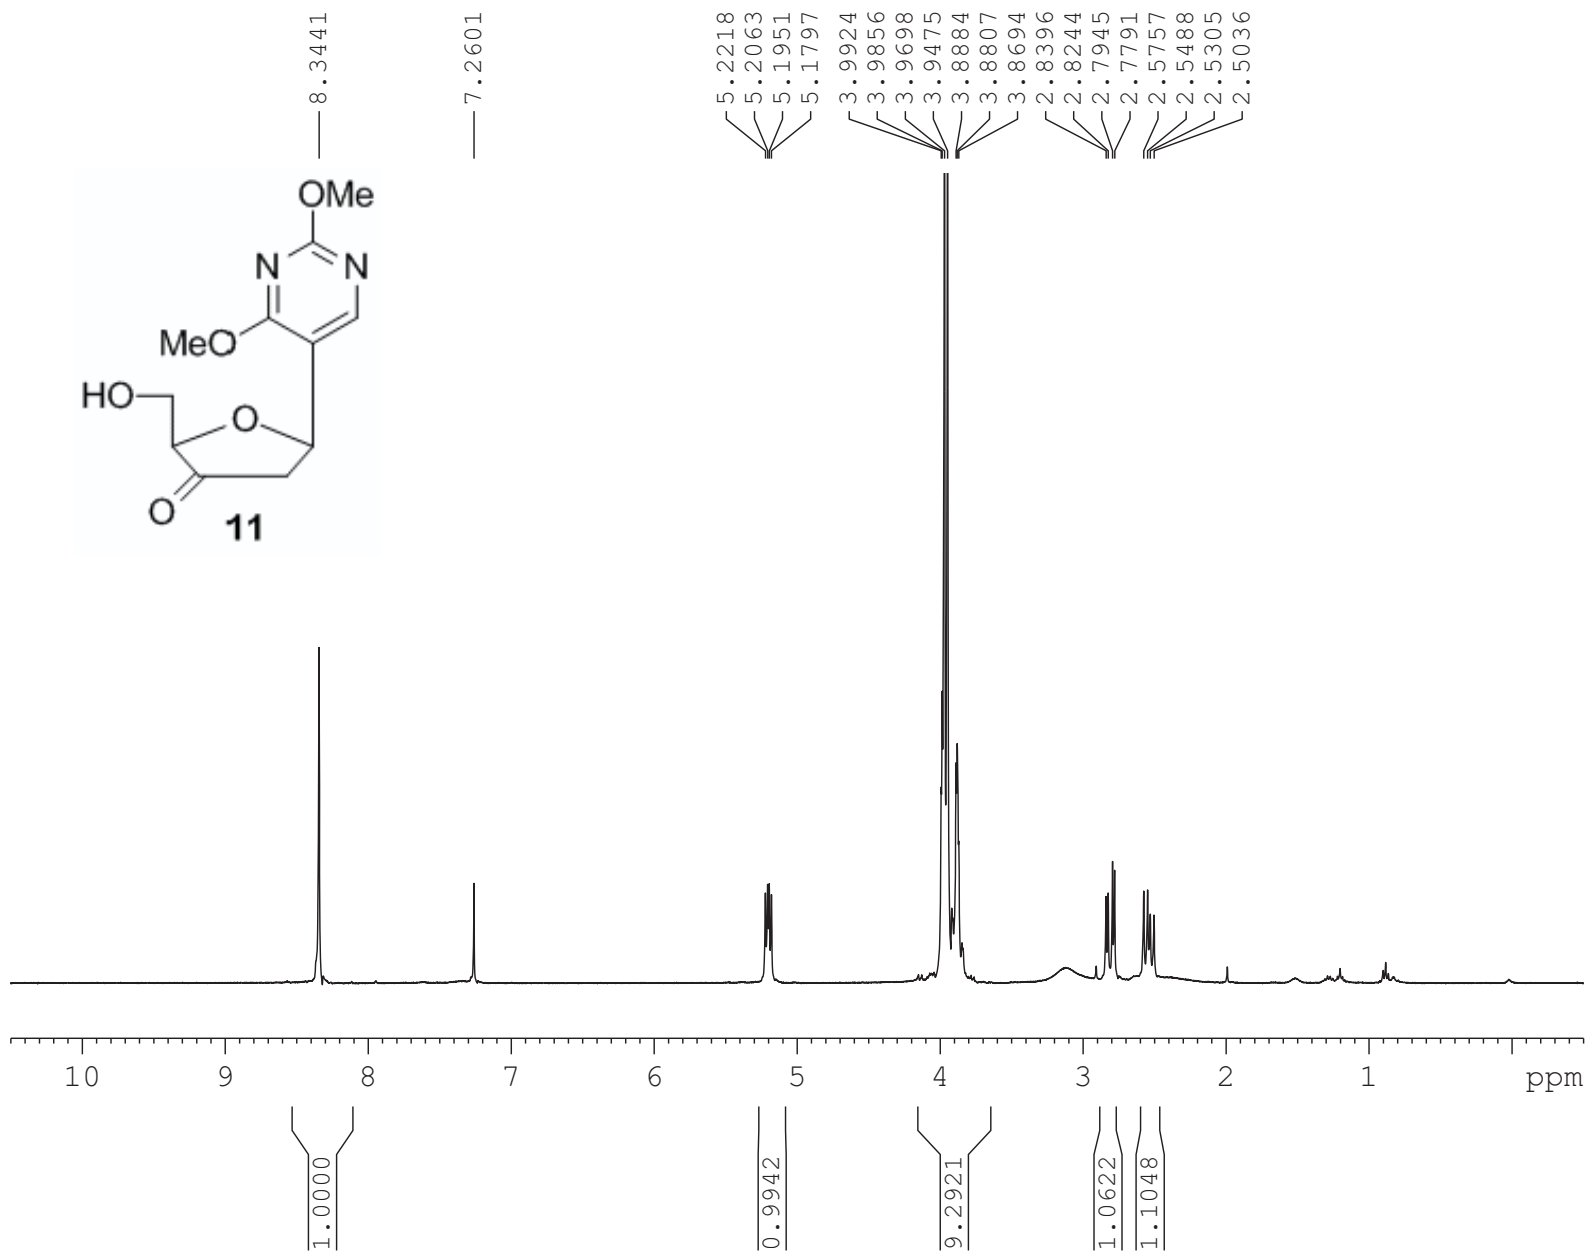

Current Data Parameters  
 NAME TQ133  
 EXPNO 1  
 PROCNO 1

F2 - Acquisition Parameters  
 Date\_ 20170213  
 Time 16.42  
 INSTRUM spect  
 PROBHD 5 mm BBO BB-1H  
 PULPROG zg30  
 TD 32768  
 SOLVENT CDCl3  
 NS 1  
 DS 0  
 SWH 7246.377 Hz  
 FIDRES 0.221142 Hz  
 AQ 2.2609921 sec  
 RG 71.8  
 DW 69.000 usec  
 DE 6.50 usec  
 TE 296.8 K  
 D1 2.0000000 sec  
 TD0 1

===== CHANNEL f1 =====  
 NUC1 1H  
 P1 14.40 usec  
 PL1 1.80 dB  
 SFO1 400.1324008 MHz

F2 - Processing parameters  
 SI 16384  
 SF 400.1300091 MHz  
 WDW EM  
 SSB 0  
 LB 0 Hz  
 GB 0  
 PC 1.00

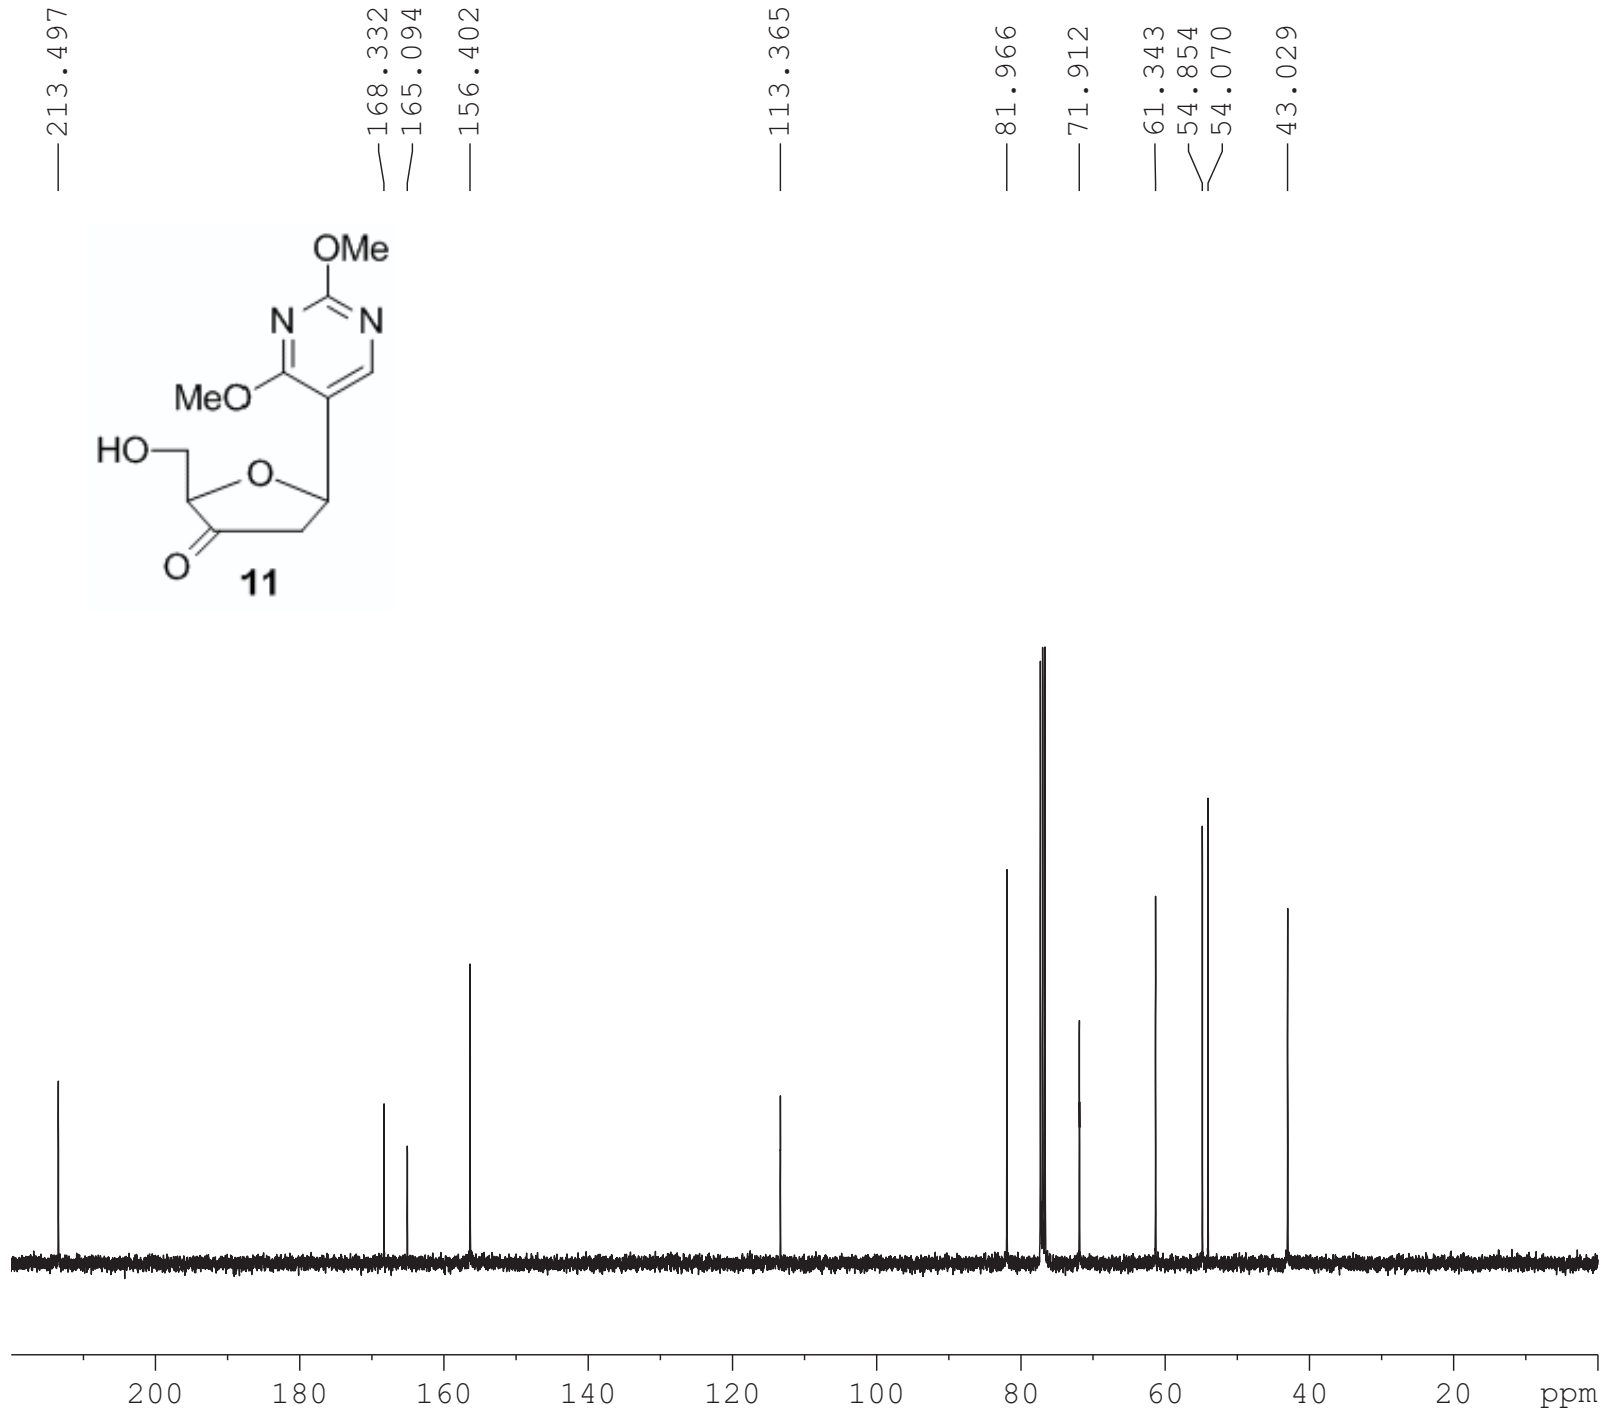

Current Data Parameters  
 NAME TQ133  
 EXPNO 3  
 PROCNO 1

F2 - Acquisition Parameters  
 Date\_ 20170213  
 Time 16.48  
 INSTRUM spect  
 PROBHD 5 mm BBO BB-1H  
 PULPROG zgpg30  
 TD 32768  
 SOLVENT CDC13  
 NS 262  
 DS 0  
 SWH 24038.461 Hz  
 FIDRES 0.733596 Hz  
 AQ 0.6815744 sec  
 RG 8192  
 DW 20.800 usec  
 DE 6.50 usec  
 TE 297.1 K  
 D1 2.00000000 sec  
 D11 0.03000000 sec  
 TD0 1

===== CHANNEL f1 =====  
 NUC1 13C  
 P1 9.00 usec  
 PL1 7.00 dB  
 SFO1 100.6233325 MHz

===== CHANNEL f2 =====  
 CPDPRG[2] waltz16  
 NUC2 1H  
 PCPD2 90.00 usec  
 PL2 1.80 dB  
 PL12 17.00 dB  
 PL13 20.00 dB  
 SFO2 400.1316005 MHz

F2 - Processing parameters  
 SI 32768  
 SF 100.6127797 MHz  
 WDW EM  
 SSB 0  
 LB 1.00 Hz  
 GB 0  
 PC 1.00

1H of P data

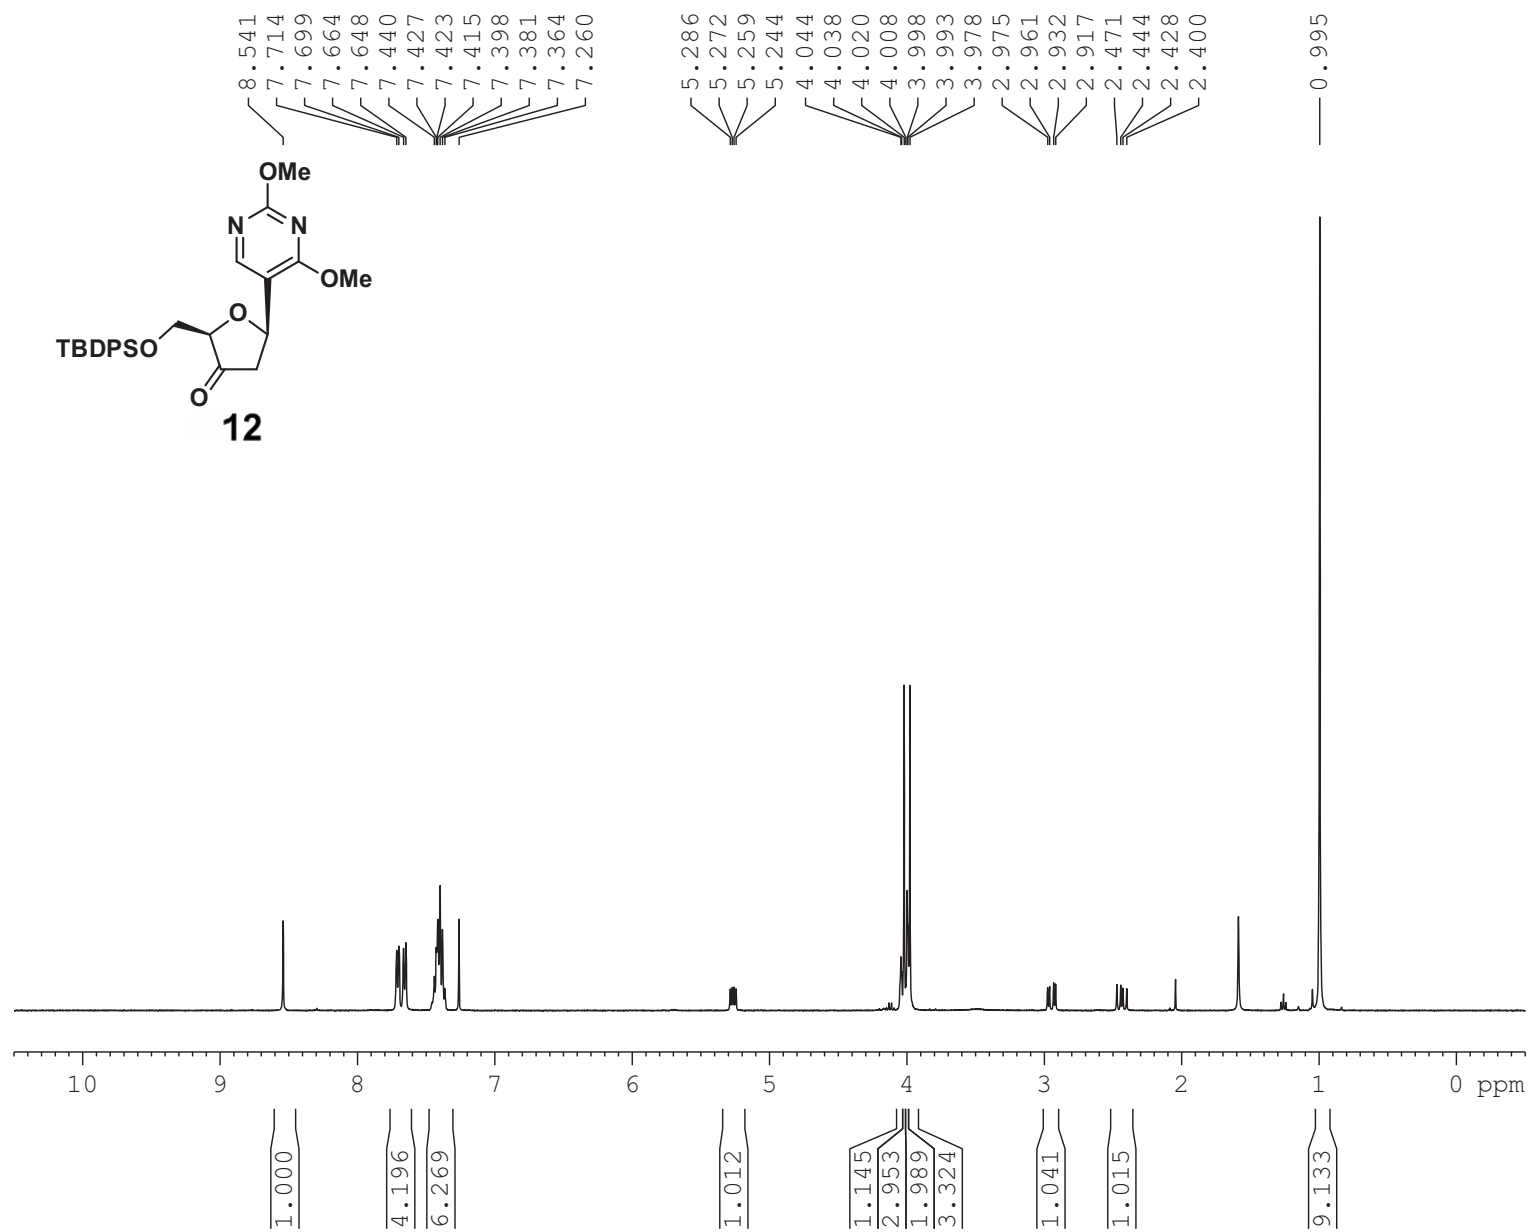

Current Data Parameters  
 NAME TQ160  
 EXPNO 1  
 PROCNO 1

F2 - Acquisition Parameters  
 Date\_ 20170317  
 Time 19.48  
 INSTRUM spect  
 PROBHD 5 mm BBO BB-1H  
 PULPROG zg30  
 TD 32768  
 SOLVENT CDCl3  
 NS 16  
 DS 0  
 SWH 7246.377 Hz  
 FIDRES 0.221142 Hz  
 AQ 2.2609921 sec  
 RG 228.1  
 DW 69.000 usec  
 DE 6.50 usec  
 TE 298.3 K  
 D1 2.0000000 sec  
 TD0 1

===== CHANNEL f1 =====  
 NUC1 1H  
 P1 14.40 usec  
 PL1 1.80 dB  
 SFO1 400.1324008 MHz

F2 - Processing parameters  
 SI 16384  
 SF 400.1300091 MHz  
 WDW EM  
 SSB 0  
 LB 0 Hz  
 GB 0  
 PC 1.00

13C of P data

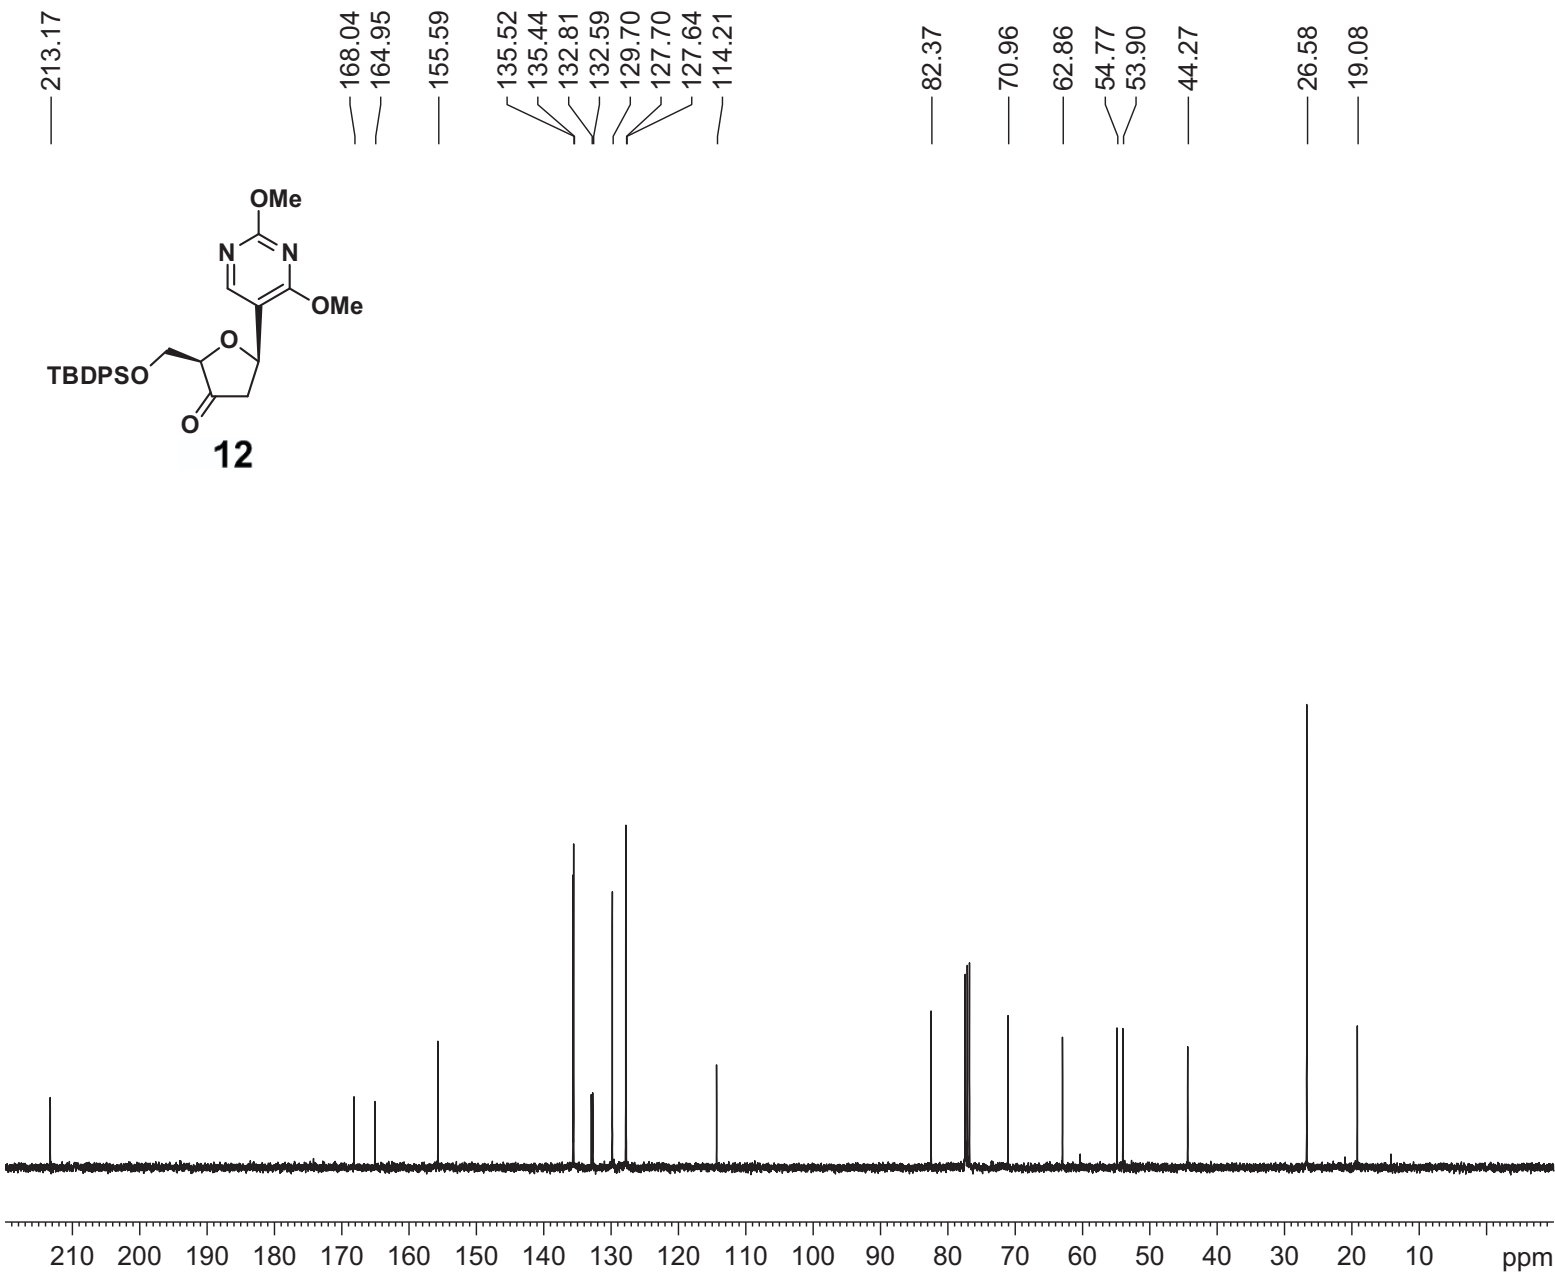

Current Data Parameters

NAME TQ160  
 EXPNO 4  
 PROCNO 1

F2 - Acquisition Parameters

Date\_ 20170317  
 Time 19.57  
 INSTRUM spect  
 PROBHD 5 mm BBO BB-1H  
 PULPROG zgpg30  
 TD 32768  
 SOLVENT CDCl3  
 NS 81  
 DS 0  
 SWH 24038.461 Hz  
 FIDRES 0.733596 Hz  
 AQ 0.6815744 sec  
 RG 4096  
 DW 20.800 usec  
 DE 6.50 usec  
 TE 298.5 K  
 D1 2.0000000 sec  
 D11 0.03000000 sec  
 TD0 1

===== CHANNEL f1 =====

NUC1 13C  
 P1 9.00 usec  
 PL1 7.00 dB  
 SFO1 100.6233325 MHz

===== CHANNEL f2 =====

CPDPRG[2] waltz16  
 NUC2 1H  
 PCPD2 90.00 usec  
 PL2 1.80 dB  
 PL12 17.00 dB  
 PL13 20.00 dB  
 SFO2 400.1316005 MHz

F2 - Processing parameters

SI 32768  
 SF 100.6127690 MHz  
 WDW EM  
 SSB 0  
 LB 1.00 Hz  
 GB 0  
 PC 1.00

1H of P data

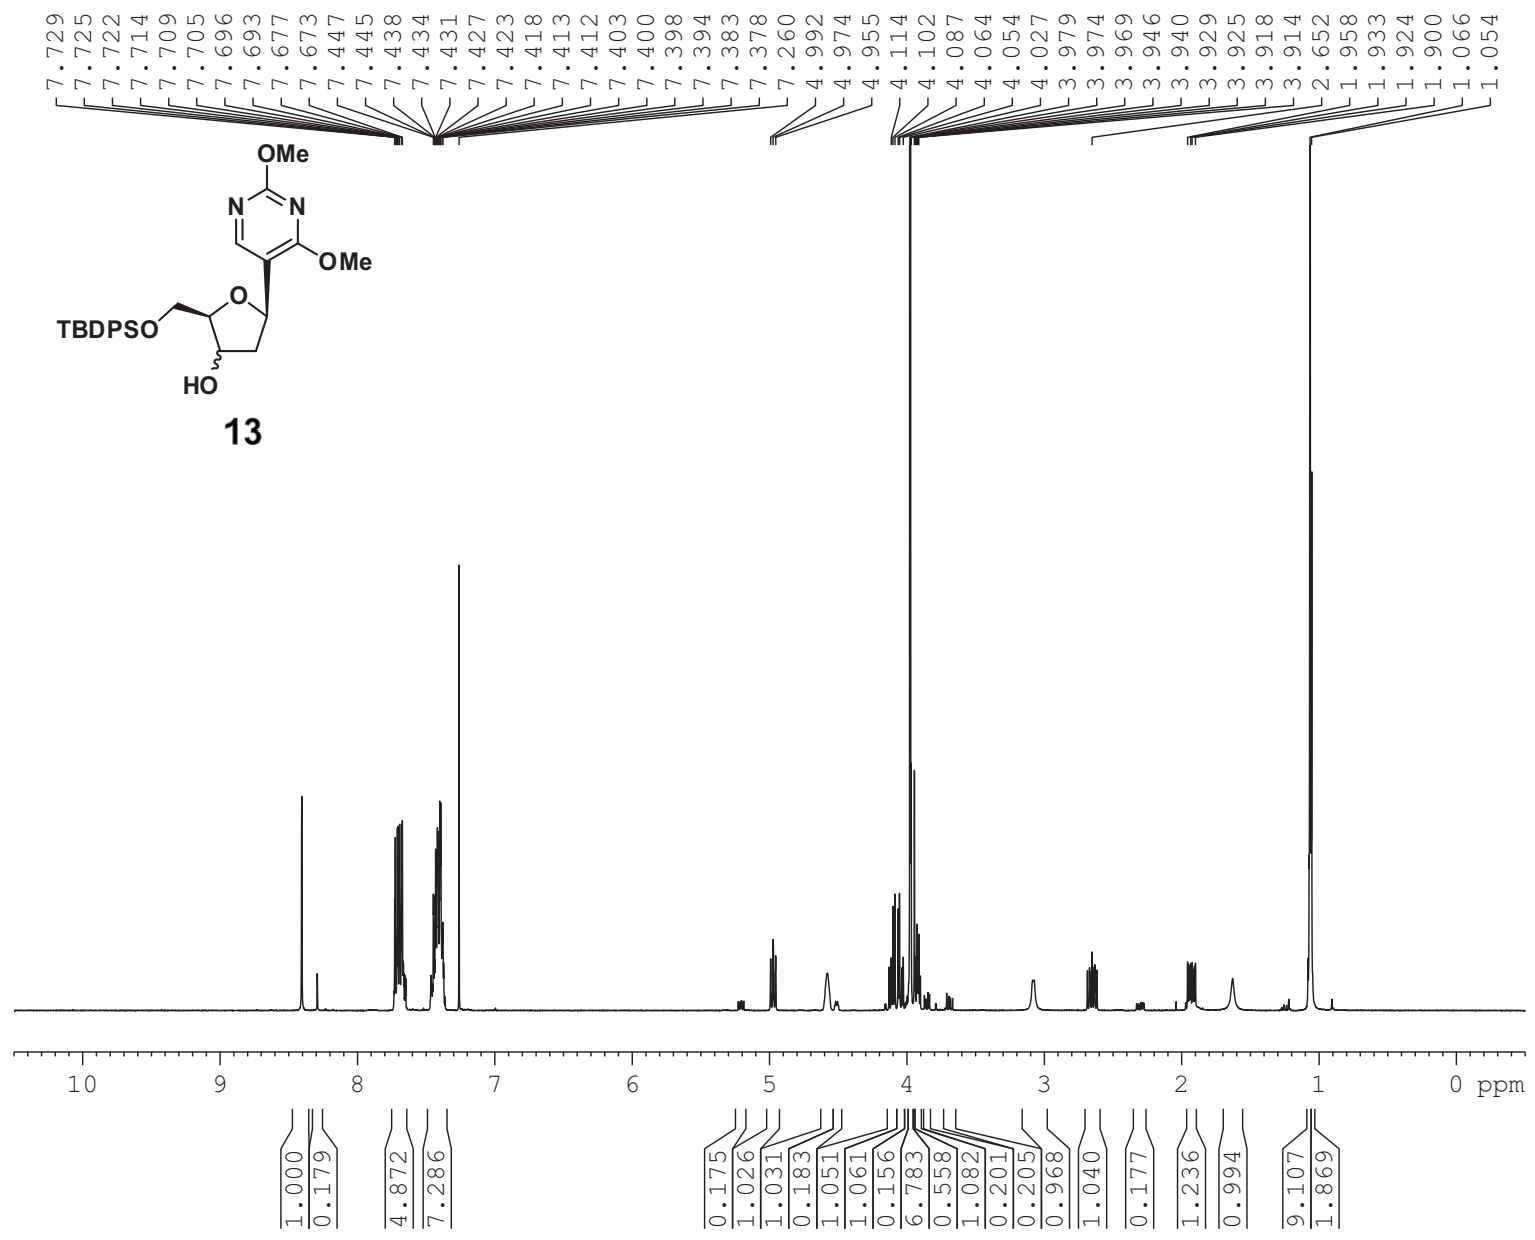

Current Data Parameters  
NAME TQ161  
EXPNO 101  
PROCNO 1

F2 - Acquisition Parameters  
Date\_ 20170318  
Time 16.42  
INSTRUM spect  
PROBHD 5 mm PABBO BB/  
PULPROG zg30  
TD 32768  
SOLVENT CDCl3  
NS 16  
DS 0  
SWH 7211.539 Hz  
FIDRES 0.220079 Hz  
AQ 2.2719147 sec  
RG 89.08  
DW 69.333 usec  
DE 10.50 usec  
TE 298.3 K  
D1 2.00000000 sec  
TD0 1

==== CHANNEL f1 =====  
SFO1 400.1324008 MHz  
NUC1 1H  
P1 12.90 usec  
PLW1 15.00000000 W

F2 - Processing parameters  
SI 16384  
SF 400.1300099 MHz  
WDW EM  
SSB 0  
LB 0 Hz  
GB 0  
PC 1.00



13C of P data

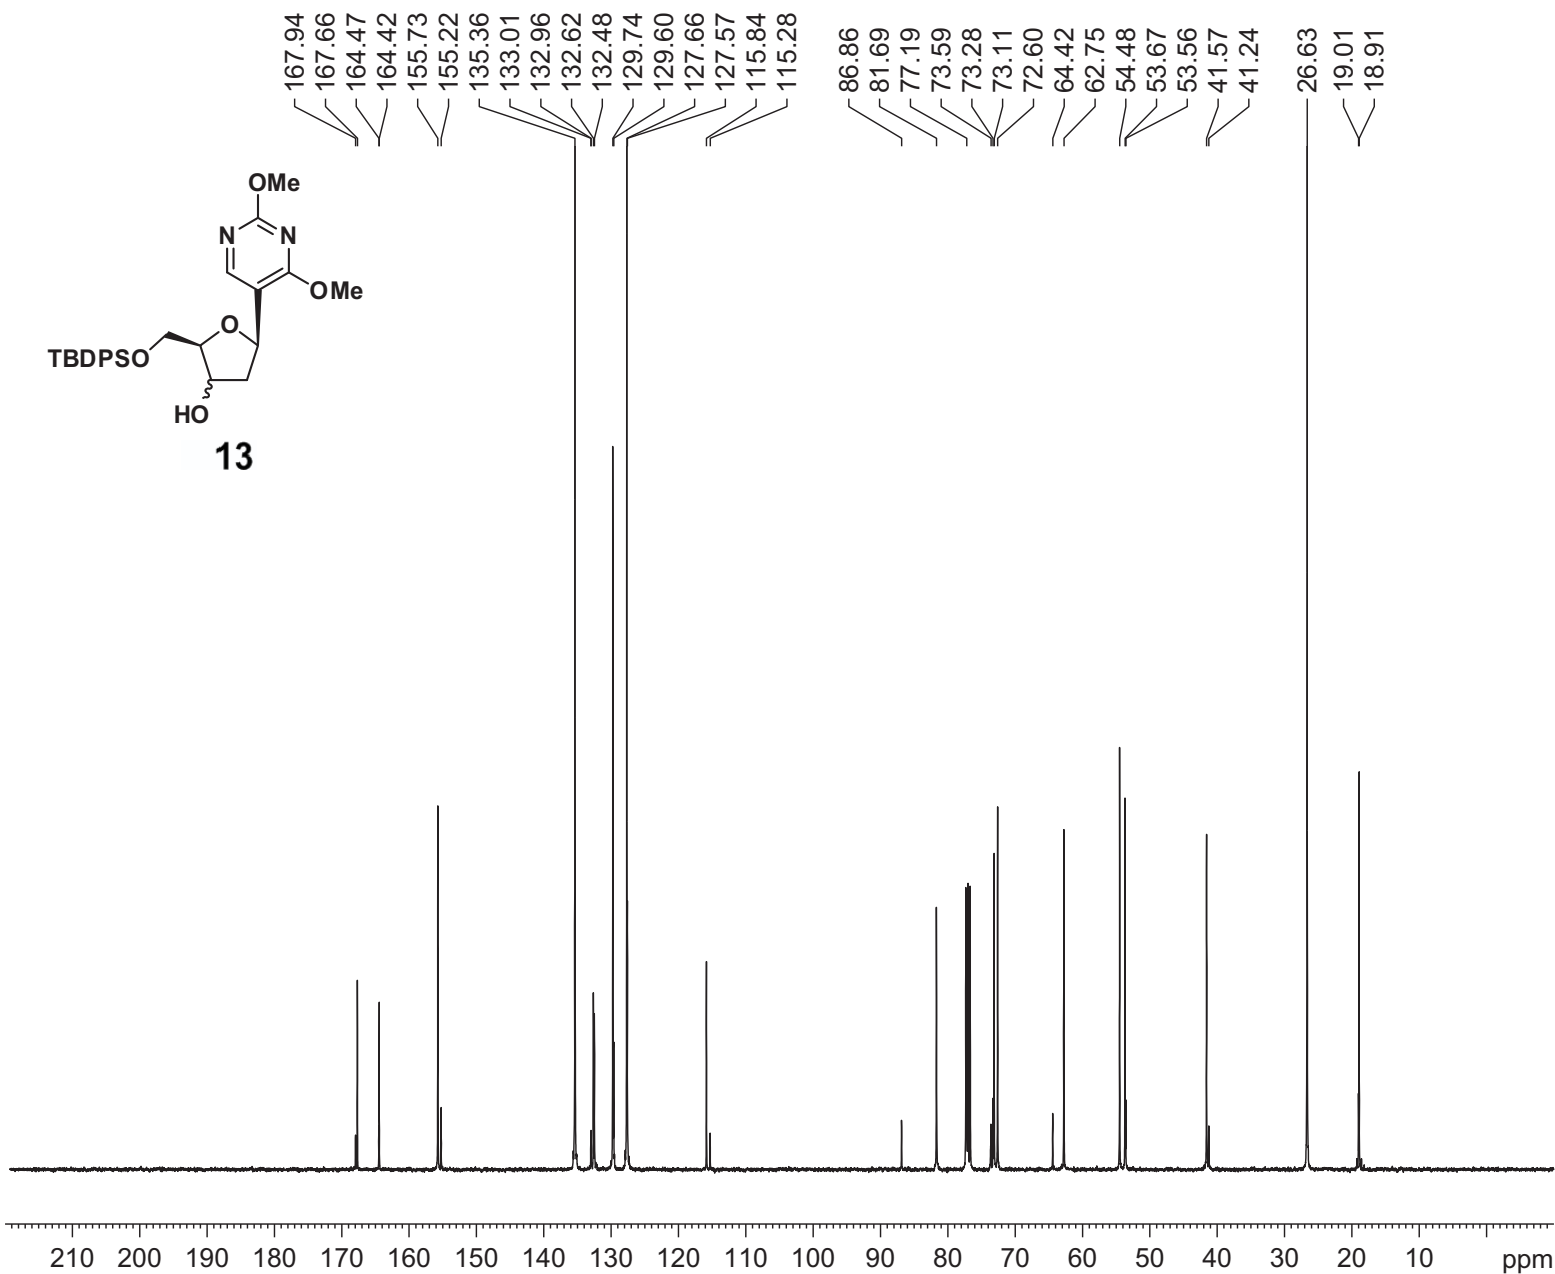

Current Data Parameters

NAME TQ161  
 EXPNO 104  
 PROCNO 1

F2 - Acquisition Parameters

Date\_ 20170318  
 Time 16.55  
 INSTRUM spect  
 PROBHD 5 mm PABBO BB/  
 PULPROG zgpg30  
 TD 32768  
 SOLVENT CDCl3  
 NS 793  
 DS 0  
 SWH 24038.461 Hz  
 FIDRES 0.733596 Hz  
 AQ 0.6815744 sec  
 RG 198.09  
 DW 20.800 usec  
 DE 6.50 usec  
 TE 298.8 K  
 D1 2.00000000 sec  
 D11 0.03000000 sec  
 TD0 1

===== CHANNEL f1 =====

SFO1 100.6228298 MHz  
 NUC1 13C  
 P1 10.00 usec  
 PLW1 47.50000000 W

===== CHANNEL f2 =====

SFO2 400.1316005 MHz  
 NUC2 1H  
 CPDPRG2 waltz16  
 PCPD2 90.00 usec  
 PLW2 15.00000000 W  
 PLW12 0.33750001 W  
 PLW13 0.27338001 W

F2 - Processing parameters

SI 32768  
 SF 100.6127905 MHz  
 WDW EM  
 SSB 0  
 LB 2.00 Hz  
 GB 0  
 PC 1.00

1H of P data

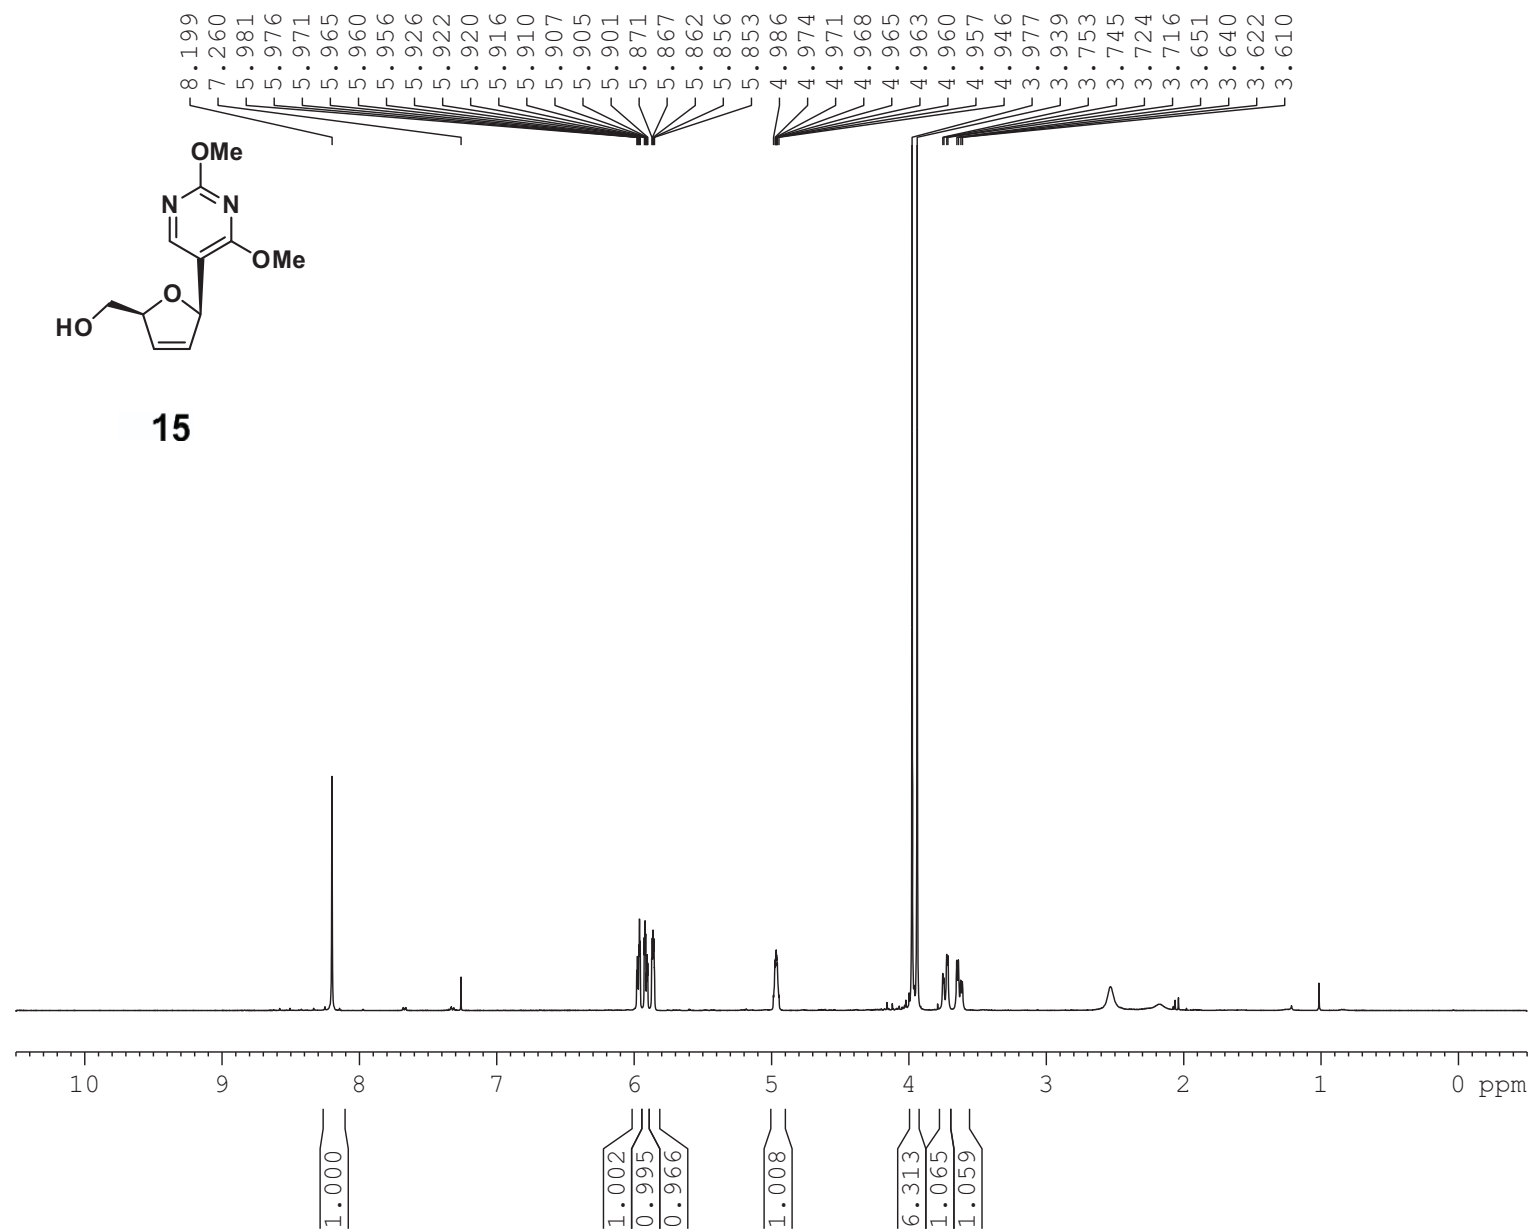

Current Data Parameters  
NAME TQ167  
EXPNO 110  
PROCNO 1

F2 - Acquisition Parameters  
Date\_ 20170331  
Time 3.29  
INSTRUM spect  
PROBHD 5 mm PABBO BB/  
PULPROG zg30  
TD 32768  
SOLVENT CDCl3  
NS 16  
DS 0  
SWH 7211.539 Hz  
FIDRES 0.220079 Hz  
AQ 2.2719147 sec  
RG 57.42  
DW 69.333 usec  
DE 10.50 usec  
TE 298.2 K  
D1 2.00000000 sec  
TD0 1

==== CHANNEL f1 =====  
SFO1 400.1324008 MHz  
NUC1 1H  
P1 12.90 usec  
PLW1 15.00000000 W

F2 - Processing parameters  
SI 16384  
SF 400.1300097 MHz  
WDW EM  
SSB 0  
LB 0 Hz  
GB 0  
PC 1.00

13C of P data

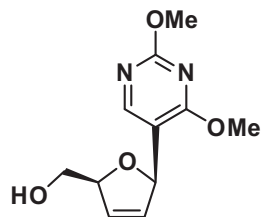

15

168.51  
164.90  
156.67  
129.81  
128.13  
114.84  
87.22  
80.75  
64.74  
54.75  
53.98

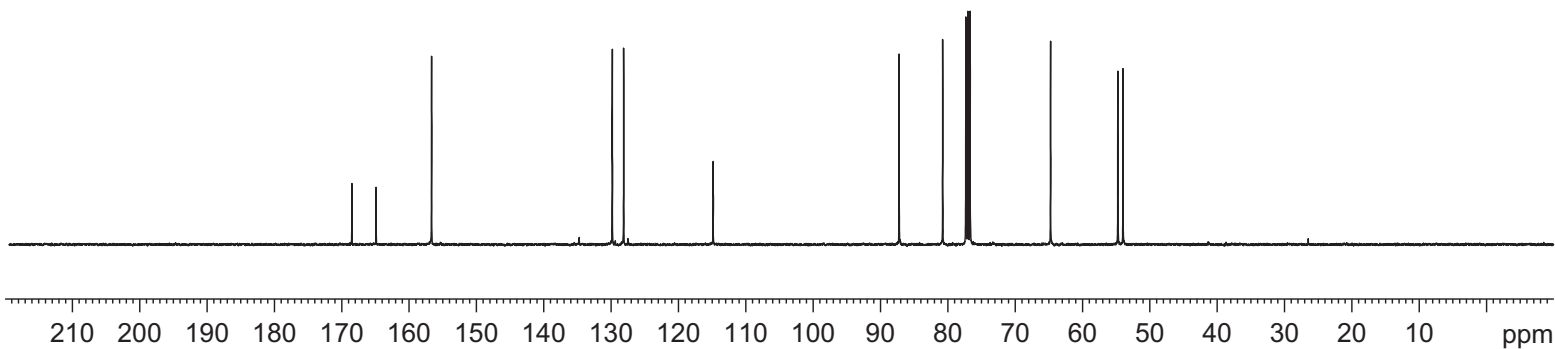

Current Data Parameters

NAME TQ167  
EXPNO 109  
PROCNO 1

F2 - Acquisition Parameters

Date\_ 20170331  
Time 3.27  
INSTRUM spect  
PROBHD 5 mm PABBO BB/  
PULPROG zgpg30  
TD 32768  
SOLVENT CDCI3  
NS 1000  
DS 0  
SWH 24038.461 Hz  
FIDRES 0.733596 Hz  
AQ 0.6815744 sec  
RG 198.09  
DW 20.800 usec  
DE 6.50 usec  
TE 298.9 K  
D1 2.00000000 sec  
D11 0.03000000 sec  
TD0 1

===== CHANNEL f1 =====

SFO1 100.6228298 MHz  
NUC1 13C  
P1 10.00 usec  
PLW1 47.50000000 W

===== CHANNEL f2 =====

SFO2 400.1316005 MHz  
NUC2 1H  
CPDPRG[2] waltz16  
PCPD2 90.00 usec  
PLW2 15.00000000 W  
PLW12 0.33750001 W  
PLW13 0.27338001 W

F2 - Processing parameters

SI 32768  
SF 100.6127766 MHz  
WDW EM  
SSB 0  
LB 2.00 Hz  
GB 0  
PC 1.00

1H of TQ170 P2 data

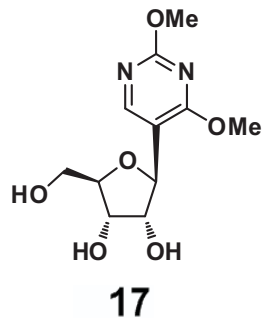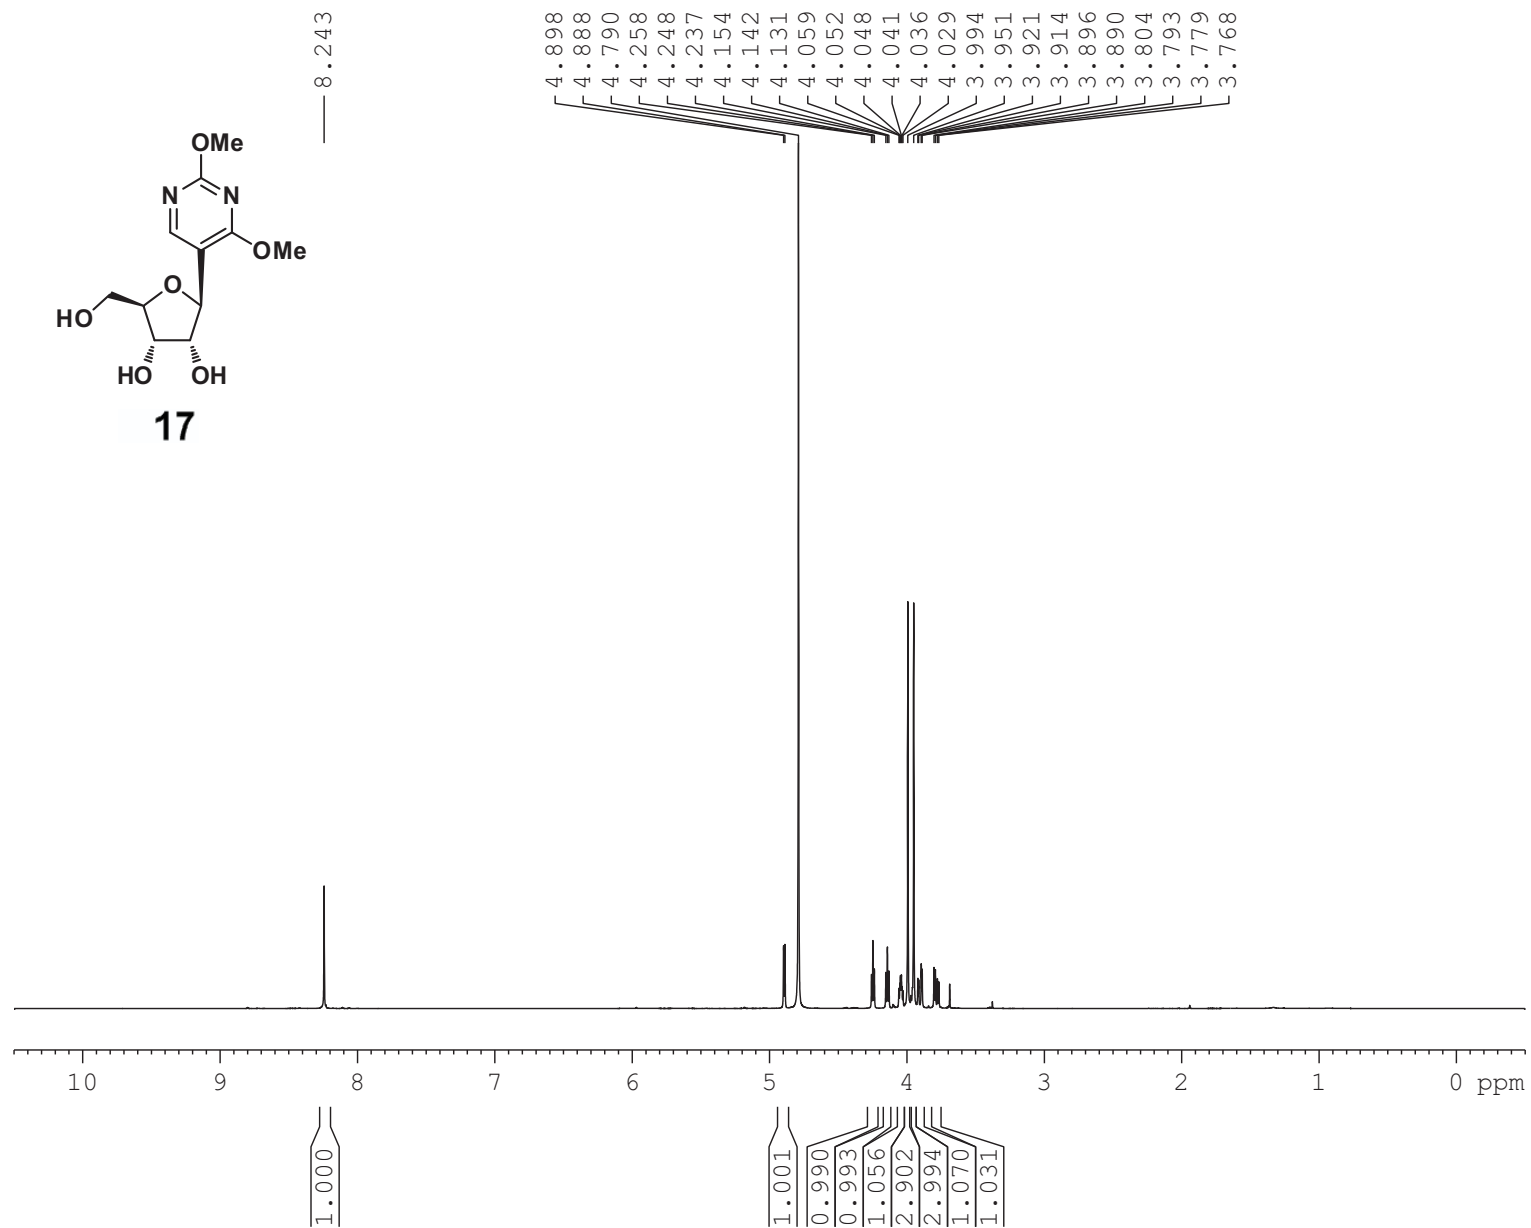

Current Data Parameters  
NAME TCC-2017030185  
EXPNO 1  
PROCNO 1

F2 - Acquisition Parameters  
Date\_ 20170330  
Time 16.40  
INSTRUM spect  
PROBHD 5 mm PABBO BB-  
PULPROG zg30  
TD 65536  
SOLVENT D2O  
NS 64  
DS 0  
SWH 6510.417 Hz  
FIDRES 0.099341 Hz  
AQ 5.0331650 sec  
RG 35.9  
DW 76.800 usec  
DE 6.50 usec  
TE 300.0 K  
D1 2.00000000 sec  
TD0 1

===== CHANNEL f1 =====  
NUC1 1H  
P1 13.30 usec  
PL1 -0.50 dB  
SFO1 500.1322506 MHz

F2 - Processing parameters  
SI 65536  
SF 500.1299561 MHz  
WDW EM  
SSB 0  
LB 0.10 Hz  
GB 0  
PC 1.00

13C of TQ170 P2 data

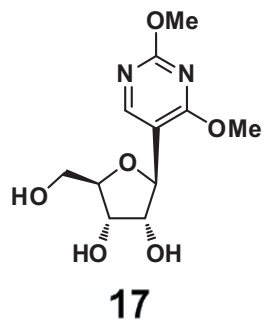

168.91  
164.66  
155.65  
  
112.86  
  
82.99  
78.75  
74.45  
70.64  
61.39  
55.00  
54.30

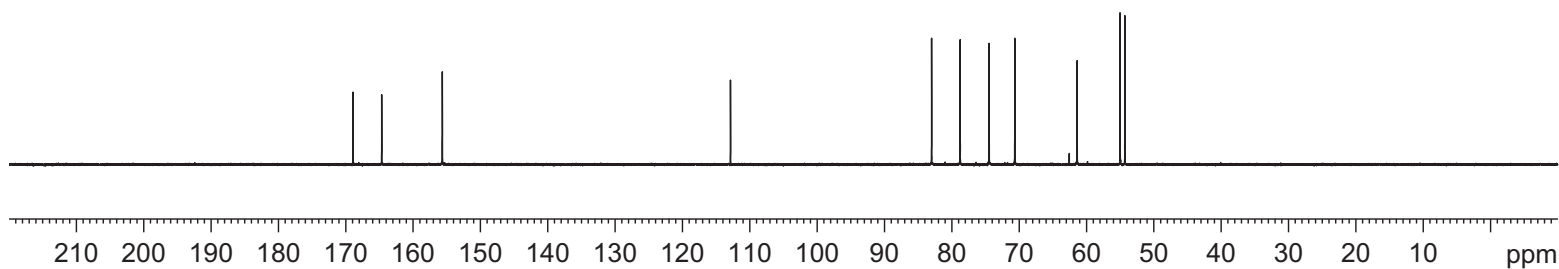

Current Data Parameters  
NAME TCC-2017030185  
EXPNO 6  
PROCNO 1

F2 - Acquisition Parameters  
Date\_ 20170331  
Time 2.06  
INSTRUM spect  
PROBHD 5 mm PABBO BB-  
PULPROG zgpg30  
TD 65536  
SOLVENT D2O  
NS 400  
DS 0  
SWH 30303.031 Hz  
FIDRES 0.462388 Hz  
AQ 1.0813440 sec  
RG 5792.6  
DW 16.500 usec  
DE 6.50 usec  
TE 300.0 K  
D1 2.00000000 sec  
D11 0.03000000 sec  
TD0 1

===== CHANNEL f1 =====  
NUC1 13C  
P1 10.10 usec  
PL1 6.00 dB  
SFO1 125.7709936 MHz

===== CHANNEL f2 =====  
CPDPRG[2] waltz16  
NUC2 1H  
PCPD2 90.00 usec  
PL2 -0.50 dB  
PL12 16.00 dB  
PL13 19.00 dB  
SFO2 500.1320005 MHz

F2 - Processing parameters  
SI 65536  
SF 125.7577890 MHz  
WDW EM  
SSB 0  
LB 1.00 Hz  
GB 0  
PC 1.00

1H of P1 data

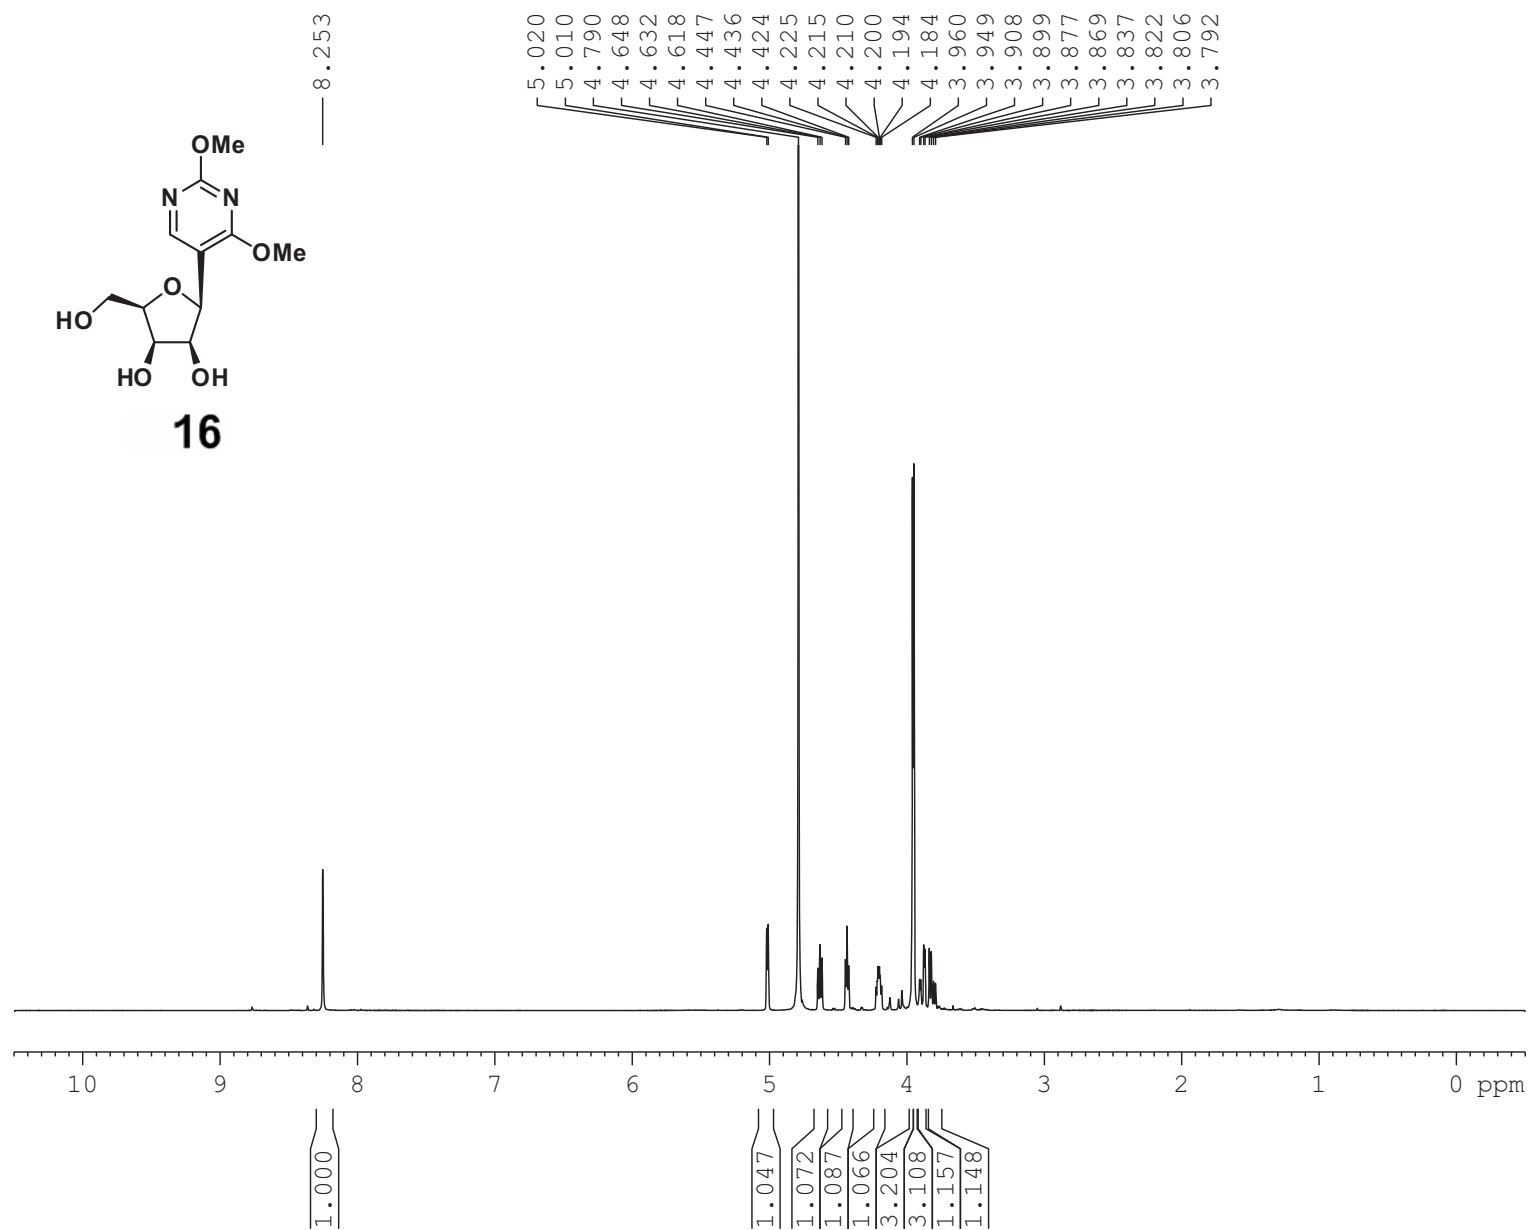

Current Data Parameters  
NAME TQ170  
EXPNO 102  
PROCNO 1

F2 - Acquisition Parameters  
Date\_ 20170419  
Time 13.13  
INSTRUM spect  
PROBHD 5 mm PABBO BB/  
PULPROG zg30  
TD 32768  
SOLVENT D2O  
NS 16  
DS 0  
SWH 7211.539 Hz  
FIDRES 0.220079 Hz  
AQ 2.2719147 sec  
RG 36.64  
DW 69.333 usec  
DE 10.50 usec  
TE 298.1 K  
D1 2.00000000 sec  
TD0 1

==== CHANNEL f1 =====  
SFO1 400.1324008 MHz  
NUC1 1H  
P1 12.90 usec  
PLW1 15.00000000 W

F2 - Processing parameters  
SI 16384  
SF 400.1299654 MHz  
WDW EM  
SSB 0  
LB 0 Hz  
GB 0  
PC 1.00

13C of P1 data

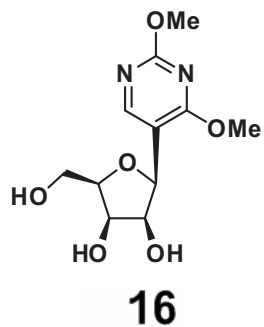

168.16  
164.38  
155.53

111.54

79.44  
75.62  
71.96  
71.11

60.40  
54.93  
54.30

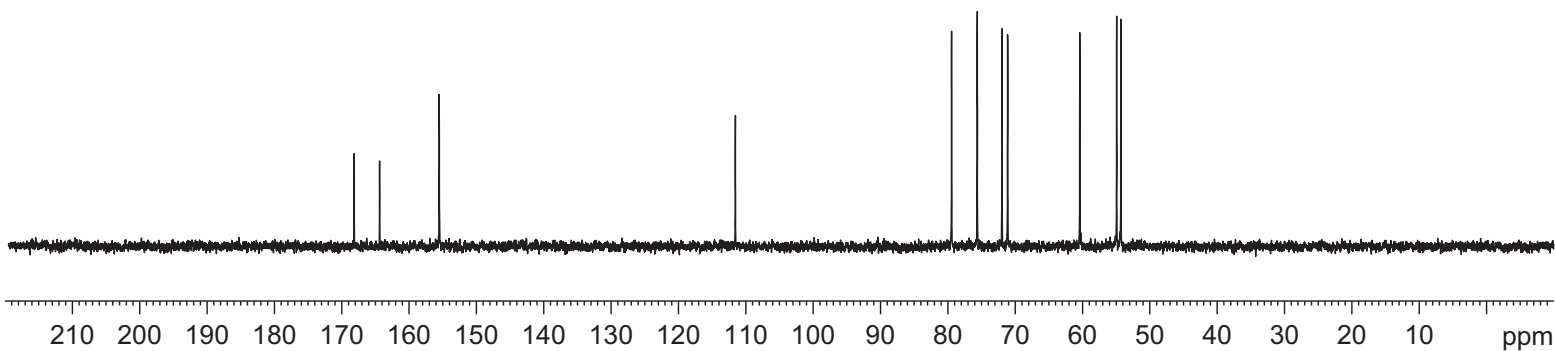

Current Data Parameters  
NAME TQ170  
EXPNO 104  
PROCNO 1

F2 - Acquisition Parameters  
Date\_ 20170419  
Time 13.19  
INSTRUM spect  
PROBHD 5 mm PABBO BB/  
PULPROG zgpg30  
TD 32768  
SOLVENT D2O  
NS 100  
DS 0  
SWH 24038.461 Hz  
FIDRES 0.733596 Hz  
AQ 0.6815744 sec  
RG 198.09  
DW 20.800 usec  
DE 6.50 usec  
TE 298.5 K  
D1 2.00000000 sec  
D11 0.03000000 sec  
TD0 1

===== CHANNEL f1 =====  
SFO1 100.6228298 MHz  
NUC1 13C  
P1 10.00 usec  
PLW1 47.50000000 W

===== CHANNEL f2 =====  
SFO2 400.1316005 MHz  
NUC2 1H  
CPDPRG[2] waltz16  
PCPD2 90.00 usec  
PLW2 15.00000000 W  
PLW12 0.33750001 W  
PLW13 0.27338001 W

F2 - Processing parameters  
SI 32768  
SF 100.6127685 MHz  
WDW EM  
SSB 0  
LB 2.00 Hz  
GB 0  
PC 1.00

1H of TQ172 P data

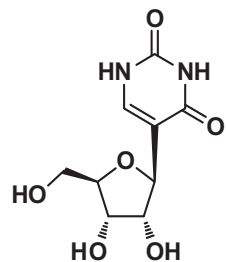

Pseudouridine (1-1)

7.516

4.462  
4.452  
3.926  
3.916  
3.907  
3.870  
3.859  
3.849  
3.704  
3.697  
3.691  
3.686  
3.679  
3.603  
3.596  
3.579  
3.573  
3.458  
3.450  
3.434  
3.427  
2.504  
2.500  
2.497

Current Data Parameters  
NAME TCC-2017040199  
EXPNO 1  
PROCNO 1

F2 - Acquisition Parameters  
Date\_ 20170407  
Time 16.59  
INSTRUM spect  
PROBHD 5 mm PABBO BB-  
PULPROG zg30  
TD 65536  
SOLVENT DMSO  
NS 128  
DS 0  
SWH 8012.820 Hz  
FIDRES 0.122266 Hz  
AQ 4.0894465 sec  
RG 128  
DW 62.400 usec  
DE 6.50 usec  
TE 300.1 K  
D1 2.00000000 sec  
TD0 1

===== CHANNEL f1 =====  
NUC1 1H  
P1 13.30 usec  
PL1 -0.50 dB  
SFO1 500.1335009 MHz

F2 - Processing parameters  
SI 65536  
SF 500.1300045 MHz  
WDW EM  
SSB 0  
LB 0 Hz  
GB 0  
PC 1.00

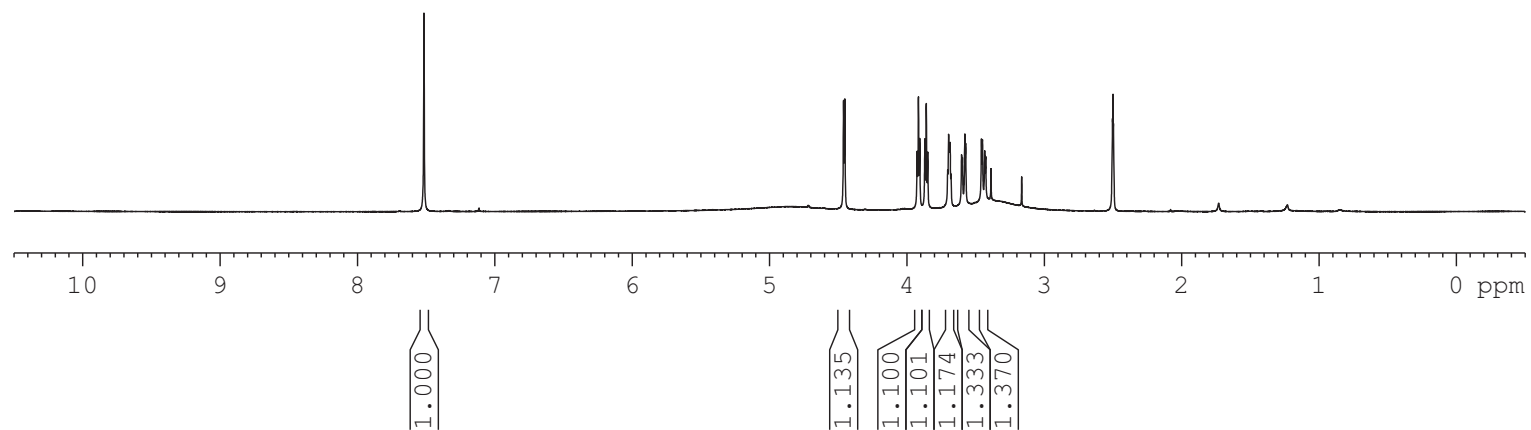



13C of TQ172 P data

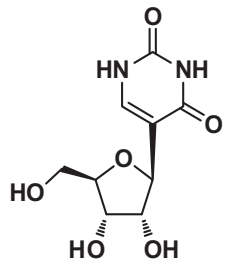

Pseudouridine (1-1)

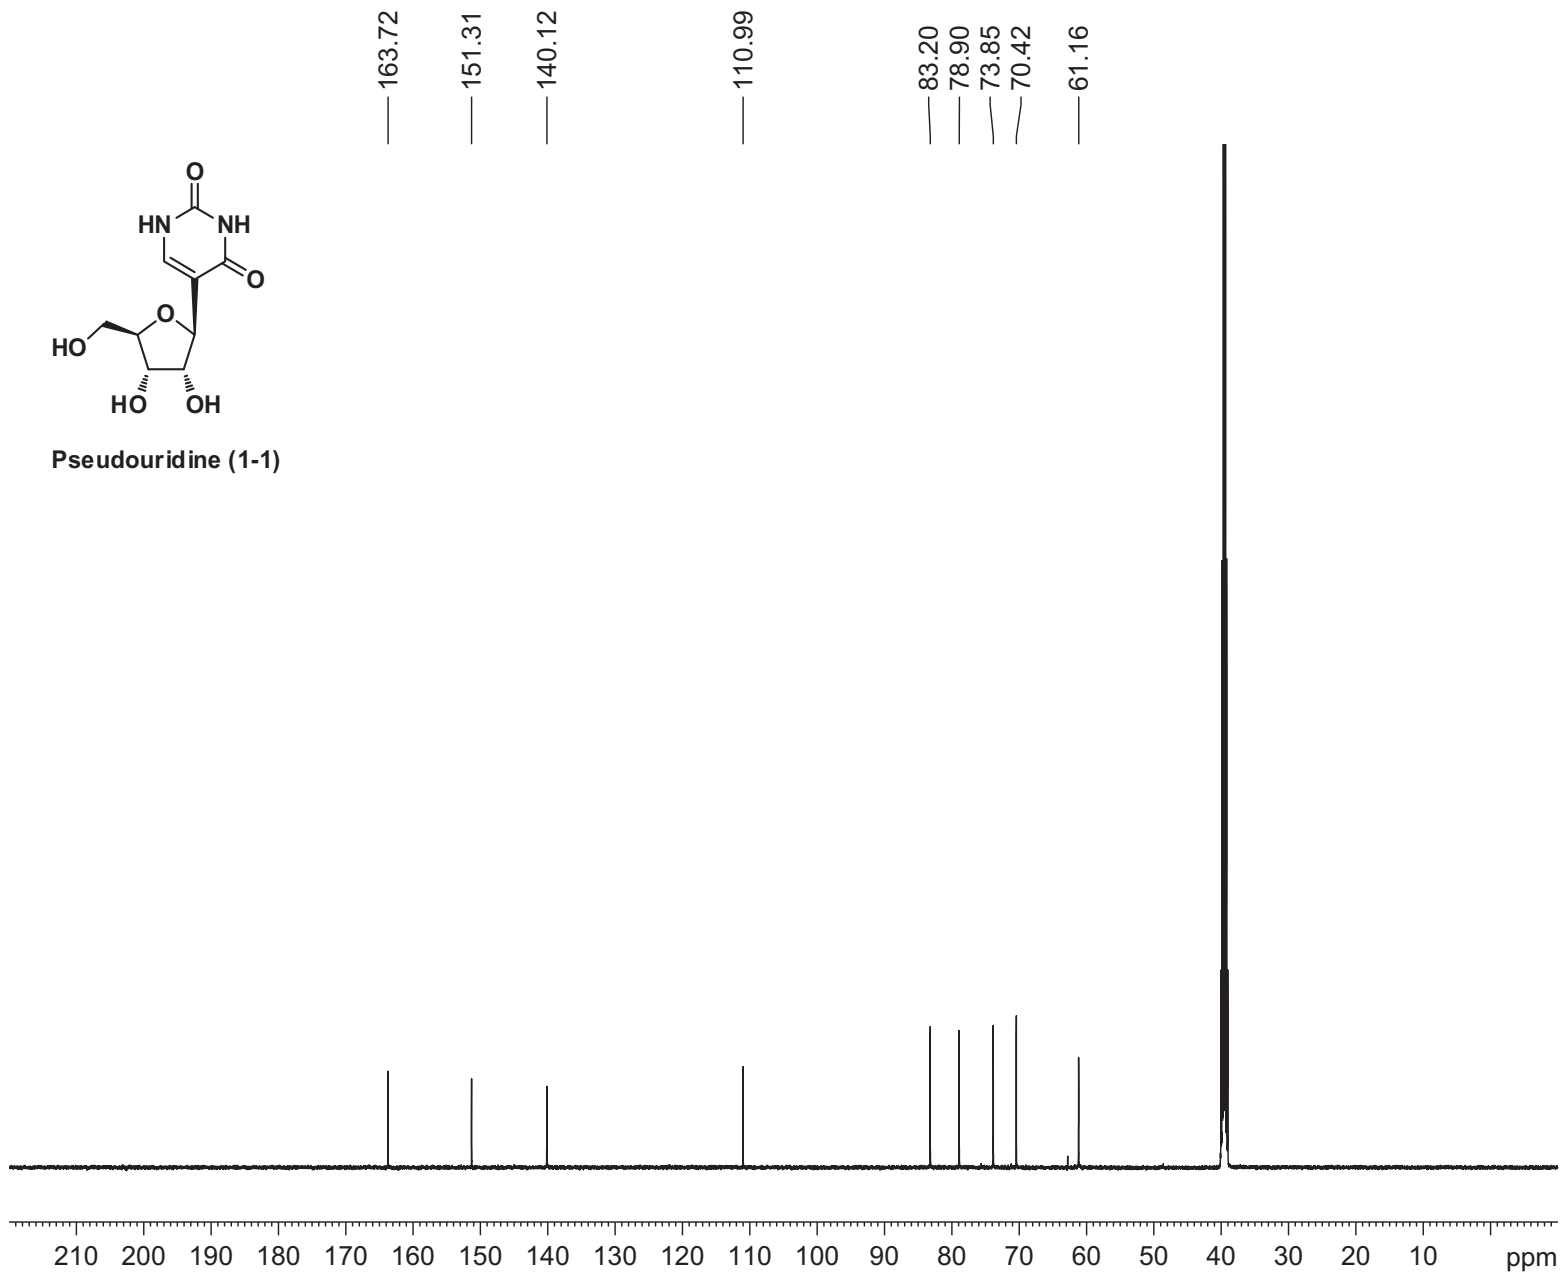

Current Data Parameters  
 NAME TCC-2017040199  
 EXPNO 6  
 PROCNO 1

F2 - Acquisition Parameters  
 Date\_ 20170408  
 Time 8.02  
 INSTRUM spect  
 PROBHD 5 mm PABBO BB-  
 PULPROG zgpg30  
 TD 65536  
 SOLVENT DMSO  
 NS 3000  
 DS 0  
 SWH 30303.031 Hz  
 FIDRES 0.462388 Hz  
 AQ 1.0813440 sec  
 RG 8192  
 DW 16.500 usec  
 DE 6.50 usec  
 TE 300.5 K  
 D1 2.00000000 sec  
 D11 0.03000000 sec  
 TD0 1

===== CHANNEL f1 =====  
 NUC1 13C  
 P1 10.10 usec  
 PL1 6.00 dB  
 SFO1 125.7709936 MHz

===== CHANNEL f2 =====  
 CPDPRG[2] waltz16  
 NUC2 1H  
 PCPD2 90.00 usec  
 PL2 -0.50 dB  
 PL12 16.00 dB  
 PL13 19.00 dB  
 SFO2 500.1320005 MHz

F2 - Processing parameters  
 SI 65536  
 SF 125.7578470 MHz  
 WDW EM  
 SSB 0  
 LB 1.00 Hz  
 GB 0  
 PC 1.00

1H of TQ172 P data

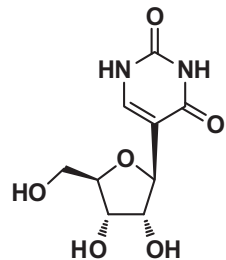

Pseudouridine (1-1)

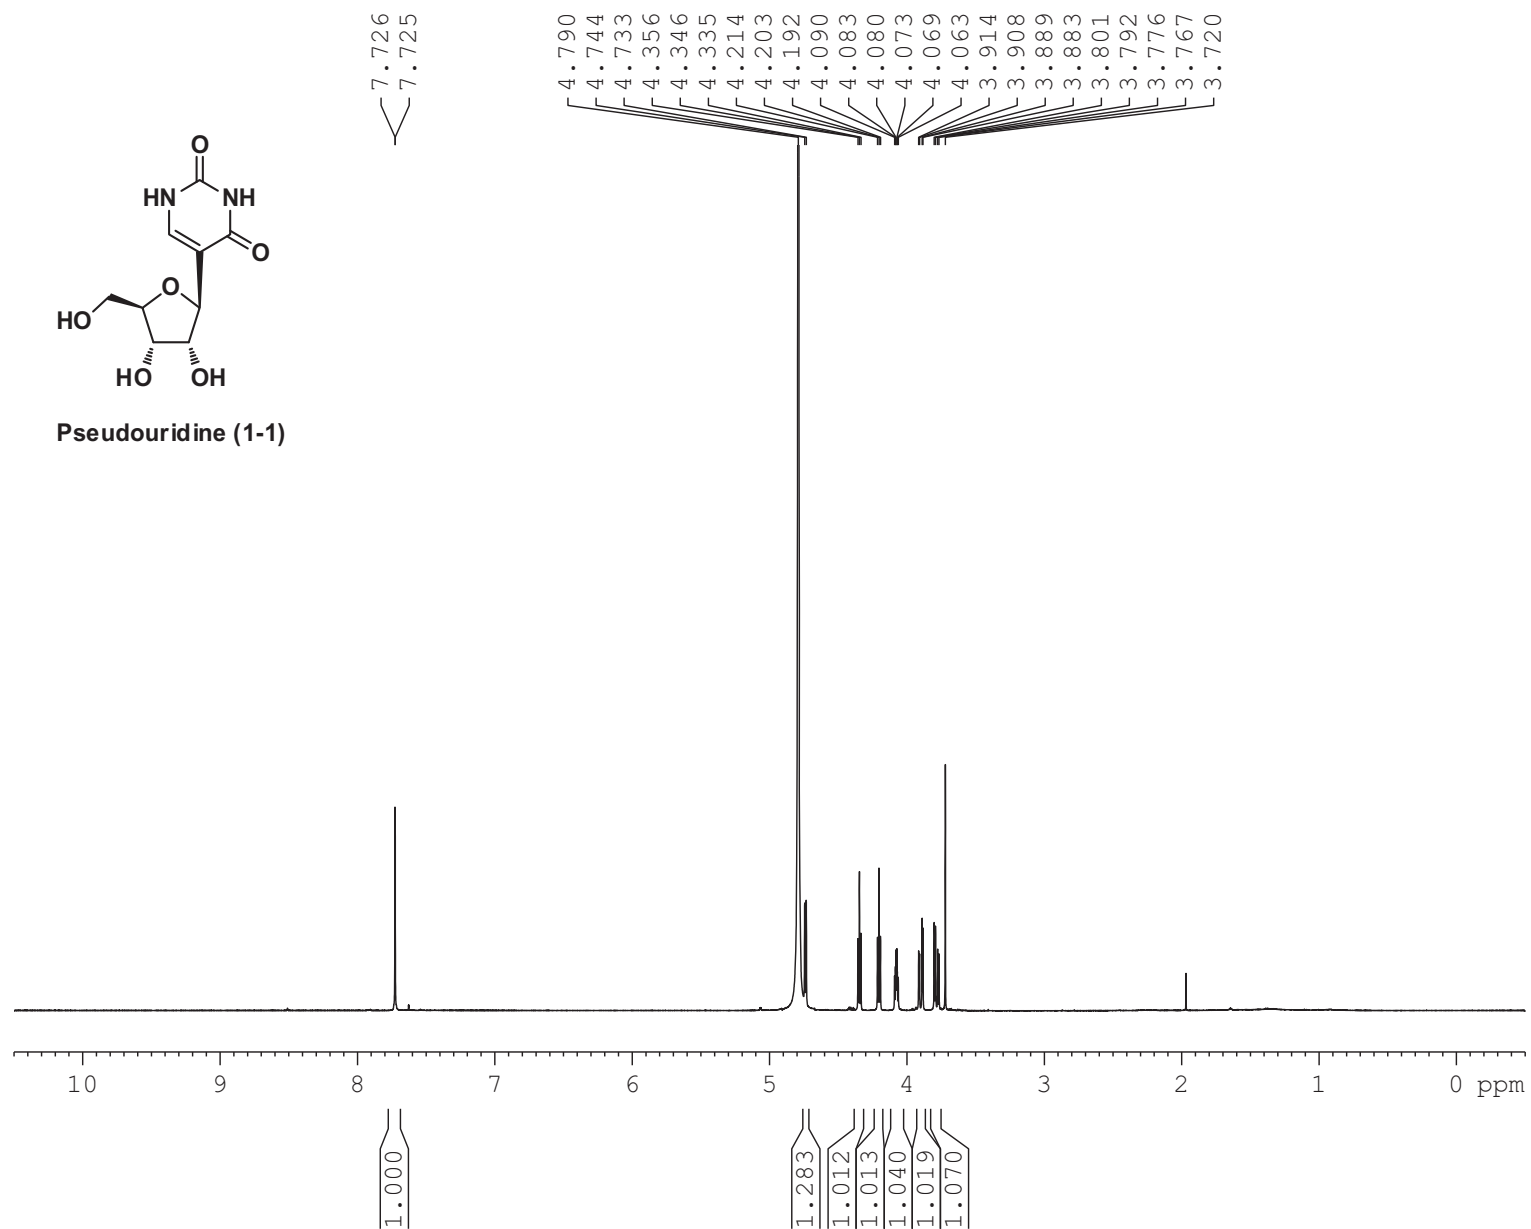

Current Data Parameters  
NAME TCC-2017040198  
EXPNO 11  
PROCNO 1

F2 - Acquisition Parameters  
Date\_ 20170420  
Time 8.48  
INSTRUM spect  
PROBHD 5 mm PABBO BB-  
PULPROG zg30  
TD 32768  
SOLVENT D2O  
NS 128  
DS 0  
SWH 6510.417 Hz  
FIDRES 0.198682 Hz  
AQ 2.5165825 sec  
RG 128  
DW 76.800 usec  
DE 6.50 usec  
TE 300.0 K  
D1 2.00000000 sec  
TD0 1

===== CHANNEL f1 =====  
NUC1 1H  
P1 13.30 usec  
PL1 -0.50 dB  
SFO1 500.1322506 MHz

F2 - Processing parameters  
SI 32768  
SF 500.1299558 MHz  
WDW EM  
SSB 0  
LB 0 Hz  
GB 0  
PC 1.00

13C of TQ172 P data

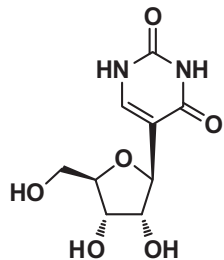

Pseudouridine (1-1)

— 165.35  
 — 152.87  
 — 141.60  
  
 — 110.50  
  
 — 83.38  
 — 79.12  
 — 73.38  
 — 70.85  
 — 61.54

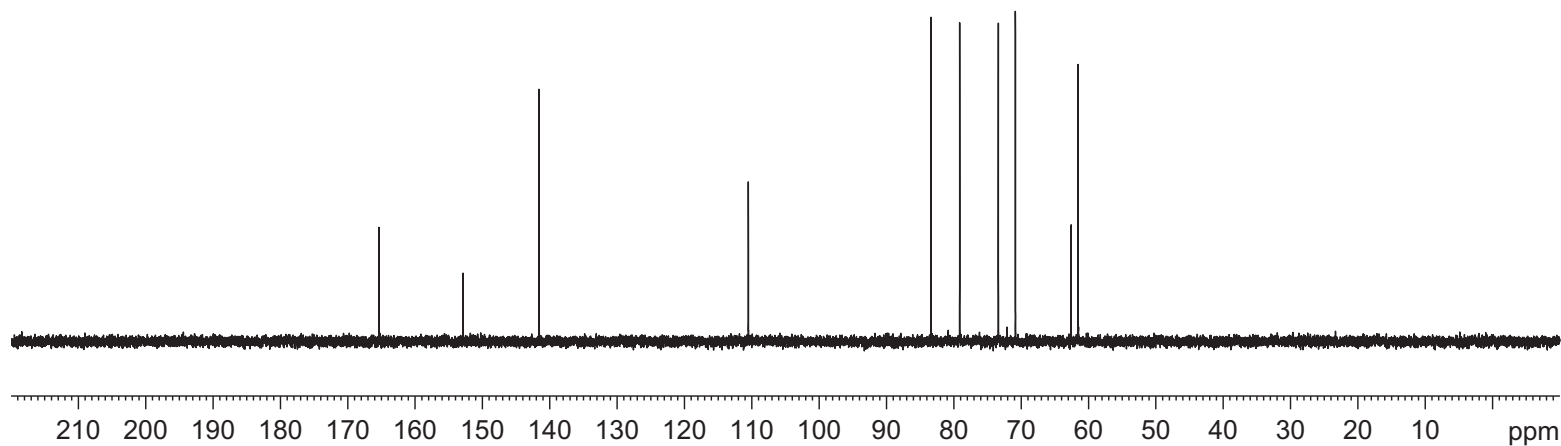

Current Data Parameters  
 NAME TCC-2017040198  
 EXPNO 6  
 PROCNO 1

F2 - Acquisition Parameters  
 Date\_ 20170420  
 Time 6.18  
 INSTRUM spect  
 PROBHD 5 mm PABBO BB-  
 PULPROG zgpg30  
 TD 65536  
 SOLVENT D2O  
 NS 4000  
 DS 0  
 SWH 30303.031 Hz  
 FIDRES 0.462388 Hz  
 AQ 1.0813440 sec  
 RG 8192  
 DW 16.500 usec  
 DE 6.50 usec  
 TE 300.0 K  
 D1 2.00000000 sec  
 D11 0.03000000 sec  
 TD0 1

===== CHANNEL f1 =====  
 NUC1 13C  
 P1 10.10 usec  
 PL1 6.00 dB  
 SFO1 125.7709936 MHz

===== CHANNEL f2 =====  
 CPDPRG[2] waltz16  
 NUC2 1H  
 PCPD2 90.00 usec  
 PL2 -0.50 dB  
 PL12 16.00 dB  
 PL13 19.00 dB  
 SFO2 500.1320005 MHz

F2 - Processing parameters  
 SI 65536  
 SF 125.7577890 MHz  
 WDW EM  
 SSB 0  
 LB 1.00 Hz  
 GB 0  
 PC 1.00

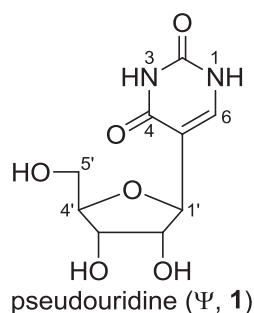

**Table S3.** Spectral data comparison:  $^1\text{H}$  NMR in  $\text{DMSO}-d_6$  ( $\delta$ , ppm)

| peak ( $^1\text{H}$ , $\delta$ ) | Smith <sup>a</sup>                                                                                            | Noyori <sup>b</sup> (100 MHz)                                                        | This work (500 MHz)                      |
|----------------------------------|---------------------------------------------------------------------------------------------------------------|--------------------------------------------------------------------------------------|------------------------------------------|
| 1                                | 7.546 (s, 1H, H-6)                                                                                            | 7.52 (d, $J = 6.0$ Hz, 1H, H-6)                                                      | 7.52 (s, 1H, H-6)                        |
| 2                                | 4.471 ( $J = 4.5$ Hz, 1H, H-1')                                                                               | 4.51 (d, $J = 4.0$ Hz, 1H, H-1')                                                     | 4.46 (d, $J = 4.5$ Hz, 1H, H-1')         |
| 3                                | 3.925 ( $J = 4.5$ Hz, 1H, H-2')                                                                               | 3.3-4.0 (m, 5H, H-2', H-3', H-4', H-5')                                              | 3.92 (t, $J = 4.8$ Hz, 1H, H-2')         |
| 4                                | 3.877 ( $J = 5.3, 4.5$ Hz, 1H, H-3')                                                                          | -----                                                                                | 3.86 (t, $J = 5.3$ Hz, 1H, H-3')         |
| 5                                | 3.706 ( $J = 5.3, 3.5, 3.0$ Hz, 1H, H-4')                                                                     | -----                                                                                | 3.69 (dt, $J = 5.5, 3.2$ Hz, 1H, H-4')   |
| 6                                | 3.601 (dd, $J = 11.9, 3.0$ Hz, 1H, H-5')                                                                      | -----                                                                                | 3.59 (dd, $J = 11.9, 3.1$ Hz, 1H, H-5a') |
| 7                                | 3.450 (dd, $J = 11.9, 3.5$ Hz, 1H, H-5')                                                                      | -----                                                                                | 3.44 (dd, $J = 11.9, 3.7$ Hz, 1H, H-5')  |
| 8                                | 4.855 (d, $J = 4.8$ Hz, 1H, OH),<br>4.743 (dd, $J = 6.2, 4.8$ Hz, 1H, OH),<br>4.655 (d, $J = 5.3$ Hz, 1H, OH) | 11.07 (br s, 1H, H-3),<br>10.85 (d, $J = 6.0$ Hz, 1H, H-1),<br>4.54 (br s, 3H, 3 OH) | -----                                    |

<sup>a</sup> Deslauriers, R.; Smith, I. C. P. *Can. J. Chem.* **1973**, *51* 833;

<sup>b</sup> Sato, T.; Hayakawa, Y.; Noyori, R. *Bull. Chem. Soc. Jpn.* **1984**, *57*, 2515

**Table S4.** Spectral data comparison:  $^{13}\text{C}$  NMR in  $\text{DMSO}-d_6$  ( $\delta$ , ppm)

| peak ( $^{13}\text{C}$ , $\delta$ ) | Wenkert <sup>a</sup> (15 MHz) | Townsend <sup>b</sup> (25 MHz) | Noyori <sup>c</sup> (20 MHz) | This work <sup>d</sup> (125 MHz) |
|-------------------------------------|-------------------------------|--------------------------------|------------------------------|----------------------------------|
| 1                                   | 164.8 (C-4)                   | 163.95 (C-4)                   | 163.57                       | 163.7                            |
| 2                                   | 152.3 (C-2)                   | 151.36 (C-2)                   | 150.98                       | 151.3                            |
| 3                                   | 141.0 (C-6)                   | 140.14 (C-6)                   | 139.62                       | 140.1 (CH)                       |
| 4                                   | 110.0 (C-5)                   | 111.27 (C-5)                   | 111.05                       | 111.0                            |
| 5                                   | 82.9 (C-4')                   | 83.60 (C-4')                   | 83.47                        | 83.2 (CH)                        |
| 6                                   | 78.6 (C-1')                   | 79.13 (C-1')                   | 78.88                        | 78.9 (CH)                        |
| 7                                   | 72.9 (C-2')                   | 74.10 (C-2')                   | 73.93                        | 73.9 (CH)                        |
| 8                                   | 71.3 (C-3')                   | 70.80 (C-3')                   | 70.62                        | 70.4 (CH)                        |
| 9                                   | 61.1 (C-5')                   | 61.55 (C-5')                   | 61.36                        | 61.2 (CH <sub>2</sub> )          |

<sup>a</sup> Wenkert, B.; Hagaman, E. W.; Gutowski, G. E.; *Biochem. Biophys. Res. Commun.* **1973**, *51*, 318;

<sup>b</sup> Chenon, M.-T.; Pugmire, R. L.; Grant, D. M.; Panzica, R. P.; Townsend, L. B. *J. Heterocycl. Chem.* **1973**, *10*, 427;

<sup>c</sup> Sato, T.; Hayakawa, Y.; Noyori, R. *Bull. Chem. Soc. Jpn.* **1984**, *57*, 2515;

<sup>d</sup> The numbers of protons directly attached to the individual carbons were determined by  $^{13}\text{C}$  NMR DEPT experiments



**Table S5.** Spectral data comparison:  $^1\text{H}$  NMR in  $\text{D}_2\text{O}$  ( $\delta$ , ppm)

| peak ( $^1\text{H}$ , $\delta$ ) | Sasaki <sup>a</sup> (100 MHz)                | Smith <sup>b,c</sup> (100 MHz)            | Chow <sup>d,e</sup> (500 MHz)     | This work (500 MHz)                     |
|----------------------------------|----------------------------------------------|-------------------------------------------|-----------------------------------|-----------------------------------------|
| 1                                | 7.63 (s, 1H, H-6)                            | 7.660 (d, $J = 0.8$ Hz, 1H, H-6)          | 7.50 (d, $J = 3.0$ Hz, 1H)        | 7.73 (d, $J = 0.6$ Hz, 1H, H-6)         |
| 2                                | 4.67 (d, $J = 5.0$ Hz, 1H, H-1')             | 4.674 (dd, $J = 5.0, 0.8$ Hz, 1H, H-1')   | 4.51 (d, $J = 5.5$ Hz, 1H)        | 4.74 (d, $J = 5.6$ Hz, 1H, H-1')        |
| 3                                | 4.27 (t, $J = 5.0$ Hz, 1H, H-2')             | 4.279 (t, $J = 5.0$ Hz, 1H, H-2')         | 4.13 (t, $J = 5.5$ Hz, 1H)        | 4.35 (t, $J = 5.5$ Hz, 1H, H-2')        |
| 4                                | 4.13 (t, $J = 5.2$ Hz, 1H, H-3')             | 4.141 (t, $J = 5.2$ Hz, 1H, H-3')         | 3.98 (t, $J = 5.5$ Hz, 1H)        | 4.20 (t, $J = 5.4$ Hz, 1H, H-3')        |
| 5                                | 4.00 (ddd, $J = 5.2, 4.5, 3.5$ Hz, 1H, H-4') | 4.009 ( $J = 5.2, 4.6, 3.2$ Hz, 1H, H-4') | 3.85 (m, 1H)                      | 4.08 (dt, $J = 5.3, 3.3$ Hz, 1H, H-4')  |
| 6                                | 3.82 (dd, $J = 12.5, 3.5$ Hz, 1H, H-5')      | 3.840 (dd, $J = 12.7, 3.2$ Hz, 1H, H-5')  | 3.68 (dd, $J = 12.0, 3.0$ Hz, 1H) | 3.90 (dd, $J = 12.5, 3.2$ Hz, 1H, H-5') |
| 7                                | 3.73 (dd, $J = 12.5, 4.5$ Hz, 1H, H-5')      | 3.726 (dd, $J = 12.7, 4.6$ Hz, 1H, H-5')  | 3.56 (dd, $J = 13.0, 5.0$ Hz, 1H) | 3.78 (dd, $J = 12.5, 4.9$ Hz, 1H, H-5') |

<sup>a</sup> Sasaki, K.; Kusakabe, Y.; Esumi, S. *J. Antibiot.* **1972**, *25*, 151;

<sup>b</sup> Frank E. Hruska, Arthur A. Grey, Ian C. P. Smith, *J. Am. Chem. Soc.* **1970**, *92*, 4088;

<sup>c</sup> Deslauriers, R.; Smith, I. C. P. *Can. J. Chem.* **1973**, *51* 833;

<sup>d</sup> Desaulniers, J.-P.; Chang, Y.-C.; Aduri, R.; Abeysirigunawardena, S. C.; SantaLucia J.; Chow, C. S. *Org. Biomol. Chem.* **2008**, *6*, 3892;

<sup>e</sup> [1,3- $^{15}\text{N}$ ]-pseudouridine

**Table S6.** Spectral data comparison:  $^{13}\text{C}$  NMR in  $\text{D}_2\text{O}$  ( $\delta$ , ppm)

| peak ( $^{13}\text{C}$ , $\delta$ ) | Chattopadhyaya <sup>a</sup> (125 MHz) | Chow <sup>b,c</sup> (125 MHz) | This work <sup>d</sup> (125 MHz) |
|-------------------------------------|---------------------------------------|-------------------------------|----------------------------------|
| 1                                   | 165.7 (C-4)                           | 165.36                        | 165.4                            |
| 2                                   | 153.2 (C-2)                           | (141.63)                      | 152.9                            |
| 3                                   | 141.9 (C-6)                           | 141.54                        | 141.6 (CH)                       |
| 4                                   | 110.9 (C-5)                           | 110.59                        | 110.5                            |
| 5                                   | -----                                 | 83.46                         | 83.4 (CH)                        |
| 6                                   | -----                                 | 79.27                         | 79.1 (CH)                        |
| 7                                   | -----                                 | 73.45                         | 73.4 (CH)                        |
| 8                                   | -----                                 | 70.92                         | 70.9 (CH)                        |
| 9                                   | -----                                 | 61.60                         | 61.5 (CH <sub>2</sub> )          |

<sup>a</sup> Luyten, I.; Pankiewicz, K. W.; Watanabe, K. A.; Chattopadhyaya, J. *J. Org. Chem.* **1998**, *63*, 1033;

<sup>b</sup> Desaulniers, J.-P.; Chang, Y.-C.; Aduri, R.; Abeysirigunawardena, S. C.; SantaLucia, J.; Chow, C. S. *Org. Biomol. Chem.* **2008**, *6*, 3892;

<sup>c</sup> [1,3- $^{15}\text{N}$ ]-pseudouridine;

<sup>d</sup> The numbers of protons directly attached to the individual carbons were determined by  $^{13}\text{C}$  NMR DEPT experiments
